# Supplementary material for: Crosstalk between Plk1, p53, cell cycle, and G2/M DNA damage checkpoint regulation in cancer: computational modeling and analysis
Source: PubMed Central journal article supplement (PMC8660825; doi:10.1038/s41540-021-00203-8), 2021-12-09
Supplement: 41540_2021_203_MOESM1_ESM.pdf [file 41540_2021_203_MOESM1_ESM.pdf]

**Supplementary Information for the Manuscript**  
**Crosstalk between Plk1, p53, Cell Cycle, and DNA Damage Checkpoint**  
**Regulation in Cancer: Computational Modeling and Analysis**

Yongwoon Jung<sup>1,#</sup>, Pavel Kraikivski<sup>2,#,\*</sup>, Sajad Shafiekhani<sup>3</sup>, Scott S. Terhune<sup>4,6</sup>, and Ranjan K. Dash<sup>1,5,6,\*</sup>

<sup>1</sup>Department of Biomedical Engineering, Medical College of Wisconsin, Milwaukee, WI 53226, USA

<sup>2</sup>Academy of Integrated Science, Division of Systems Biology, Virginia Tech, Blacksburg, VA 24061, USA

<sup>3</sup>Department of Biomedical Engineering, School of Medicine, Tehran University of Medical Sciences, Tehran, Iran

<sup>4</sup>Departments of Microbiology and Immunology, Medical College of Wisconsin, Milwaukee, WI 53226, USA

<sup>5</sup>Department of Physiology, Medical College of Wisconsin, Milwaukee, WI 53226, USA

<sup>6</sup>Center of Systems and Molecular Medicine, Medical College of Wisconsin, Milwaukee, WI 53226, USA

#These authors contributed equally to this work as first authors

\*These authors contributed equally to this work as senior authors

Correspondence: [pavelkr@vt.edu](mailto:pavelkr@vt.edu); [rdash@mcw.edu](mailto:rdash@mcw.edu)

## Overview of Supplementary Materials

This supplemental text includes 9 Supplementary Tables and 8 sets of Supplementary Figures. Supplementary Tables and Supplementary Figures are presented in the order they are cited in the main text.

Our complete model consists 15 synthesis, 26 reactions of multiple degradations and 22 transformation reactions (Supplementary Table 1), 34 ODEs (Supplementary Table 2), and 137 parameters (Supplementary Table 3). Initial conditions are also provided in Supplementary Table 2.

Supplementary Figure 1 demonstrates that the limit cycle exists only for a specific range of parameter values. For example, the limit cycle is observed when  $k_{s8}$  parameter values is between 0.08 and 0.1, but not for values of  $k_{s8}$  less than or equal to 0.07 and greater than or equal to 0.5. These results indicate that there are Hopf bifurcation points between  $k_{s8}=0.07$  and  $k_{s8}=0.5$ . For all other parameter.

Supplementary Table 4 provides left and right endpoints of the interval that covers corresponding parameter values for which limit cycle oscillations exist.

Supplementary Figure 2 shows the period of oscillations of ATM/ATR, p53, Wip1, Mdm2 regulators depending on Plk1 depletion levels.

Supplementary Table 5 provides the number of different cancer cell lines that carry a specific gene mutation from Dependency Map database (depmap.org) and the number of cell lines for which CRISPR data are available.

To compute the average logarithmic sensitivity intensity for  $k^{\text{th}}$  protein, we compute the logarithmic sensitivity intensity  $S_{P_i}^k$  (see definition in the main text) of this protein for every parameter  $P_i$  ( $i=1 \dots 137$ ) and then define the average as:

$$\langle S^k \rangle = \frac{1}{137} \sum_{i=1}^{137} S_{P_i}^k$$

Supplementary Table 6 provides the average logarithmic sensitivity intensities for WT, Plk1-depleted WT, p53-null cancer, and Plk1-depleted p53-null cancer cells.

Supplementary Table 7 provides the list of twenty proteins with largest average logarithmic sensitivity intensities.

The average logarithmic sensitivity intensities for 50 model components are also shown in Supplementary Figure 3.

Supplementary Figure 4 shows the logarithmic sensitivity intensities for some important regulators involved in G2/M DNA damage checkpoint and cell cycle regulations as function of varied parameters that control expression of 15 proteins.

Supplementary Figure 5 show results of Partial Rank Correlation Coefficients (PRCC) analysis for the following four cases: 1) p53-wt Plk1-normal, 2) p53-wt Plk1 depleted by 45%, 3) p53-null Plk1-normal, 4) p53-null Plk1 depleted by 45%.

Supplementary Figure 6 and Supplementary Figure 7 show results of Fuzzy analysis for the following four cases: 1) p53-wt Plk1-normal, 2) p53-wt Plk1 depleted by 45%, 3) p53-null Plk1-normal, 4) p53-null Plk1 depleted by 45%. Case #2 and Case #4 are combined in Supplementary Figure 5. Case #1 and Case #3 are combined in Supplementary Figure 6.

Supplementary Table 8 provides predicted phenotypes of p53-wt and p53-null cancer cells that carry a mutation in the interaction described by the corresponding parameter that is set to 0. The mutation can induce the cell cycle arrest or cause the change in cell cycle period which is represented by the ratio  $T_m/T$ , where  $T_m$  is the mutant cell cycle period and  $T$  is the cell cycle period in wild type.

Supplementary Figure 8 and Supplementary Figure 9 show the effect of gene deletions on the phenotypes of p53-wt and p53-null cancer cells.

Supplementary Table 9 provides parameter values used to model cell lines and CRISPR perturbations.

The MATLAB code is posted in GitHub at <https://github.com/Yongwoon-Jung/PLK1>.

**Supplementary Table 1. Reactions**

|                                                                                                                                                                                                                                                                                                                                                                                          |     |
|------------------------------------------------------------------------------------------------------------------------------------------------------------------------------------------------------------------------------------------------------------------------------------------------------------------------------------------------------------------------------------------|-----|
| $\xrightarrow{k_{s1}} \text{CycB} \xrightarrow{k_{d1.1}, k_{d1.2}S_6, k_{d1.3}S_7}$ <p><math>S_6 = \text{APC/CP:Cdc20}; S_7 = \text{APC/CT:Cdh1}</math></p>                                                                                                                                                                                                                              | (1) |
| $\text{CycB} + \text{CDK1} \xrightleftharpoons[k_{r1}]{k_{f1}} \text{MPF}$                                                                                                                                                                                                                                                                                                               | (2) |
| $\text{preMPF} \xrightleftharpoons[k_{r2}]{k_{f2}} \text{MPF}$ $\text{MPF} \xrightarrow{k_{d3.1}, k_{d3.2}S_6, k_{d3.3}S_7}$ $\text{preMPF} \xrightarrow{k_{d4.1}, k_{d4.2}S_6, k_{d4.3}S_7}$ <p><math>k_{f2} = k'_{f2}[\text{Cdc25P}] + k''_{f2}[\text{Cdc25}]</math></p> <p><math>k_{r2} = k'_{r2}[\text{Wee1}] + k''_{r2}[\text{Wee1P}]</math></p>                                    | (3) |
| $\text{Cdc25} \xrightleftharpoons[k_{r3}]{k_{f3}} \text{Cdc25P}$ $\text{Cdc25P} \xrightarrow{k_{d7.1}, k_{d7.3}S_7}$ $\xrightarrow{k_{s8}S_3} \text{Cdc25} \xrightarrow{k_{d8.1}, k_{d8.3}S_7}$ <p><math>k_{s8}S_3 = k_{s8} \frac{K_{A2}}{K_{A2} + [\text{ATM/ATR}]}</math></p> <p><math>k_{f3} = k'_{f3}[\text{MPF}] + k''_{f3}[\text{Plk1P}]; k_{r3} = k'_{r3}[\text{PP2A}]</math></p> | (4) |
| $\text{Wee1} \xrightleftharpoons[k_{r4}]{k_{f4}} \text{Wee1P}$ $\xrightarrow{k_{s9}} \text{Wee1} \xrightarrow{k_{d9}}$ $\text{Wee1P} \xrightarrow{k_{d10}}$ <p><math>k_{f4} = k'_{f4}[\text{MPF}] + k''_{f4}[\text{Plk1P}]; k_{r4} = k'_{r4}[\text{PP2A}]</math></p>                                                                                                                     | (5) |

|                                                                                                                                                                                                                                                                                                                                                                                                   |     |
|---------------------------------------------------------------------------------------------------------------------------------------------------------------------------------------------------------------------------------------------------------------------------------------------------------------------------------------------------------------------------------------------------|-----|
| $p21:MPF \xrightleftharpoons[k_{r5}]{k_{f5}} 3p21 + MPF$ $\xrightarrow{k_{s5}S_5} p21 \xrightarrow{k_{d5}}$ $k_{s5}S_5 = k_{s5}(1 + [p53]/K_{p53})$                                                                                                                                                                                                                                               | (6) |
| $Plk1 \xrightleftharpoons[k_{r6}]{k_{f6}} Plk1P$ $Plk1P \xrightarrow{k_{d11.1}, k_{d11.3}S_7}$ $\xrightarrow{k_{s12}} Plk1 \xrightarrow{k_{d12.1}, k_{d12.3}S_7}$ $k_{f6} = k'_{f6}[MPF] \frac{K_{A1}}{K_{A1} + [ATM/ATR]}; \quad k_{r6} = k'_{r6}[PP2A]$                                                                                                                                         | (7) |
| $PP2AP \xrightleftharpoons[k_{r7}]{k_{f7}} PP2A$ $\xrightarrow{k_{s13}} PP2A \xrightarrow{k_{d13}}$ $PP2AP \xrightarrow{k_{d14}}$ $k_{r7} = k'_{r7}[MPF]$                                                                                                                                                                                                                                         | (8) |
| <p>(i) <math>APC/C \xrightleftharpoons[k_{r8}]{k_{f8}} APC/CP</math></p> $\xrightarrow{k_{s15}} APC/C \xrightarrow{k_{d15}}$ $APC/CP \xrightarrow{k_{d16}}$ <p>(ii) <math>APC/C:Cdh1 \xrightleftharpoons[k_{r8}]{k_{f8}} APC/CP:Cdh1</math></p> <p>(iii) <math>APC/CP:Cdc20 \xrightarrow{k_{r8}} APC/C + Cdc20</math></p> $k_{f8} = k'_{f8}[MPF] + k''_{f8}[Plk1P]; \quad k_{r8} = k'_{r8}[PP2A]$ | (9) |

|                                                                                                                                                                                                                                                                                                                                                                                                                                                                                 |      |
|---------------------------------------------------------------------------------------------------------------------------------------------------------------------------------------------------------------------------------------------------------------------------------------------------------------------------------------------------------------------------------------------------------------------------------------------------------------------------------|------|
| <p>(i) <math>Cdc20P \xrightleftharpoons[k_{r9}]{k_{f9}} Cdc20</math></p> <p><math>\xrightarrow{k_{s17}} Cdc20 \xrightarrow{k_{d17.1}, k_{d17.3}S_7}</math></p> <p><math>Cdc20P \xrightarrow{k_{d18.1}, k_{d18.3}S_7}</math></p> <p>(ii) <math>APC/CP:Cdc20 \xrightarrow{k_{r9}} APC/CP + Cdc20P</math></p> <p><math>k_{r9} = k'_{r9}[MPF] + k''_{r9}[Plk1P]; k_{f9} = k'_{f9}[PP2A]</math></p>                                                                                  | (10) |
| <p><math>APC/CP + Cdc20 \xrightleftharpoons[k_{r10}]{k_{f10}} APC/CP:Cdc20</math></p>                                                                                                                                                                                                                                                                                                                                                                                           | (11) |
| <p>(i) <math>Cdh1P \xrightleftharpoons[k_{r11}]{k_{f11}} Cdh1</math></p> <p><math>\xrightarrow{k_{s20}} Cdh1 \xrightarrow{k_{d20}}</math></p> <p><math>Cdh1P \xrightarrow{k_{d21}}</math></p> <p>(ii) <math>APC/C:Cdh1 \xrightarrow{k_{r11}} APC/C + Cdh1P</math></p> <p>(iii) <math>APC/CP:Cdh1 \xrightarrow{k_{r11}} APC/CP + Cdh1P</math></p> <p><math>k_{r11} = k'_{r11}[MPF] + k''_{r11}[Plk1P]; k_{f11} = k'_{f11}[PP2A] \frac{K_{Pttg1}}{K_{Pttg1} + [Pttg1]}</math></p> | (12) |
| <p><math>APC/C + Cdh1 \xrightleftharpoons[k_{r12}]{k_{f12}} APC/C:Cdh1</math></p>                                                                                                                                                                                                                                                                                                                                                                                               | (13) |
| <p><math>APC/CP + Cdh1 \xrightleftharpoons[k_{r13}]{k_{f13}} APC/CP:Cdh1</math></p>                                                                                                                                                                                                                                                                                                                                                                                             | (14) |
| <p><math>Pttg1P \xrightleftharpoons[k_{r14}]{k_{f14}} Pttg1</math></p> <p><math>\xrightarrow{k_{s24}} Pttg1 \xrightarrow{k_{d24.1}, k_{d24.2}S_6}</math></p> <p><math>Pttg1P \xrightarrow{k_{d25.1}, k_{d25.2}S_6}</math></p>                                                                                                                                                                                                                                                   | (15) |

|                                                                                                                                                                                                                                                                                                                                                                                   |      |
|-----------------------------------------------------------------------------------------------------------------------------------------------------------------------------------------------------------------------------------------------------------------------------------------------------------------------------------------------------------------------------------|------|
| $k_{r14} = k'_{r14}[\text{MPF}]; k_{f14} = k'_{f14}[\text{PP2A}]$                                                                                                                                                                                                                                                                                                                 |      |
| $\text{LMNA} \xrightleftharpoons[k_{r15}]{k_{f15}} \text{LMNAP}$ $k_{f15} = k'_{f15}[\text{MPF}]$                                                                                                                                                                                                                                                                                 | (16) |
| $\xrightarrow{k_{s27}\text{DDS}} \text{ATM/ATR} \xrightarrow{k_{d27}, k_{d27.1}S_2}$ $k_{d27.1}S_2 = k_{d27.1} \frac{[\text{Wip1}]^4}{K_{\text{Wip1}}^4 + [\text{Wip1}]^4}$                                                                                                                                                                                                       | (17) |
| $\text{p53} \xrightleftharpoons[k_{r16}]{k_{f16}} \text{p53P}$ $\xrightarrow{k_{s28}S_3} \text{p53} \xrightarrow{k_{d28}, k_{d28.1}S_4}$ $\text{p53P} \xrightarrow{k_{d28}, k_{d28.1}S_4}$ $S_4 = \text{Mdm2}$ $k_{s28}S_3 = k_{s28}(1 + [\text{ATM/ATR}]/K_{A3})$ $k_{f16} = k'_{f16} \frac{[\text{ATM/ATR}]^4}{K_{A4}^4 + [\text{ATM/ATR}]^4}; k_{r16} = k'_{r16}[\text{Wip1}]$ | (18) |
| $\xrightarrow{k_{s31}, k_{s31.1}S_8} \text{Mdm2} \xrightarrow{k_{d31}, k_{d31.1}S_3}$ $S_8 = \text{p53P}; S_3 = \text{ATM/ATR}$                                                                                                                                                                                                                                                   | (19) |
| $\xrightarrow{k_{s32}, k_{s32.1}S_8} \text{Wip1} \xrightarrow{k_{d32}}$                                                                                                                                                                                                                                                                                                           | (20) |
| $\text{p53P} + \text{Plk1P} \xrightleftharpoons[k_{r17}]{k_{f17}} \text{p53P:Plk1P}$                                                                                                                                                                                                                                                                                              | (21) |
| $\text{Mad2} + \text{Cdc20P} \xrightleftharpoons[k_{r18}]{k_{f18}} \text{Mad2:Cdc20P}$ $\xrightarrow{k_{s33}} \text{Mad2} \xrightarrow{k_{d33}}$ $k_{r18} = k'_{r18}(1 + [\text{p21}]/K_{\text{MCD}} + \varepsilon[\text{Plk1P}]/K_{\text{MCD}})$                                                                                                                                 | (22) |

**Supplementary Table 2. Model differential equations and initial conditions** ( $\tau=1.65$ : Time scaling factor)

|                                                                                                                                                                                                                                                                                                                                                                                                                                                                                                                                                                                                                                                                                                                         |     |
|-------------------------------------------------------------------------------------------------------------------------------------------------------------------------------------------------------------------------------------------------------------------------------------------------------------------------------------------------------------------------------------------------------------------------------------------------------------------------------------------------------------------------------------------------------------------------------------------------------------------------------------------------------------------------------------------------------------------------|-----|
| $\frac{1}{\tau} \frac{d[\text{CycB}]}{dt} = k_{s1} + k_{r1}[\text{MPF}] - k_{f1}[\text{CycB}][\text{CDK1}]$ $- \left( k_{d1.1} + k_{d1.2} \frac{[\text{APC/CP:Cdc20}]}{K_{\text{CycB1}} + [\text{CycB}]} + k_{d1.3} \frac{[\text{APC/CT:Cdh1}]}{K_{\text{CycB2}} + [\text{CycB}]} \right) [\text{CycB}]$ <p>[CycB](0)=0</p>                                                                                                                                                                                                                                                                                                                                                                                             | (1) |
| $\frac{1}{\tau} \frac{d[\text{CDK1}]}{dt} = -k_{f1}[\text{CycB}][\text{CDK1}] + k_{r1}[\text{MPF}]$ $+ \left( k_{d3.1} + k_{d3.2} \frac{[\text{APC/CP:Cdc20}]}{K_{\text{MPF1}} + [\text{MPF}]} + k_{d3.3} \frac{[\text{APC/CT:Cdh1}]}{K_{\text{MPF2}} + [\text{MPF}]} \right) [\text{MPF}]$ $+ \left( k_{d4.1} + k_{d4.2} \frac{[\text{APC/CP:Cdc20}]}{K_{\text{preMPF1}} + [\text{preMPF}]} \right.$ $\left. + k_{d4.3} \frac{[\text{APC/CT:Cdh1}]}{K_{\text{preMPF2}} + [\text{preMPF}]} \right) [\text{preMPF}]$ <p>[CDK1T]=1 and [CDK1](0)=1</p>                                                                                                                                                                    | (2) |
| $\frac{1}{\tau} \frac{d[\text{MPF}]}{dt} = k_{f1}[\text{CycB}][\text{CDK1}] - k_{r1}[\text{MPF}] + k_{f2}[\text{preMPF}] - k_{r2}[\text{MPF}]$ $+ k_{f5}[\text{p21:MPF}] - k_{r5}[\text{p21}]^3[\text{MPF}]$ $+ k_{d6.2} \left( \frac{[\text{APC/CP:Cdc20}]}{K_{\text{p21MPF1}} + [\text{p21:MPF}]} \right) [\text{p21:MPF}]$ $- \left( k_{d3.1} + k_{d3.2} \frac{[\text{APC/CP:Cdc20}]}{K_{\text{MPF1}} + [\text{MPF}]} + k_{d3.3} \frac{[\text{APC/CT:Cdh1}]}{K_{\text{MPF2}} + [\text{MPF}]} \right) [\text{MPF}]$ <p><math>k_{f2} = k'_{f2}[\text{Cdc25P}] + k''_{f2}[\text{Cdc25}]</math>, <math>k_{r2} = k'_{r2}[\text{Wee1}] + k''_{r2}[\text{Wee1P}]</math>, as in Supplementary Table 1.</p> <p>[MPF](0)=0</p> | (3) |



|                                                                                                                                                                                                                                                                                                                                                                                                                                             |     |
|---------------------------------------------------------------------------------------------------------------------------------------------------------------------------------------------------------------------------------------------------------------------------------------------------------------------------------------------------------------------------------------------------------------------------------------------|-----|
| $\frac{1}{\tau} \frac{d[\text{preMPF}]}{dt} = k_{r2}[\text{MPF}] - k_{f2}[\text{preMPF}]$ $- \left( k_{d4.1} + k_{d4.2} \frac{[\text{APC/CP:Cdc20}]}{K_{\text{preMPF1}} + [\text{preMPF}]} \right.$ $\left. + k_{d4.3} \frac{[\text{APC/CT:Cdh1}]}{K_{\text{preMPF2}} + [\text{preMPF}]} \right) [\text{preMPF}]$ <p>[preMPF](0)=0</p>                                                                                                      | (4) |
| $\frac{1}{\tau} \frac{d[\text{p21}]}{dt} = k_{s5}(1 + [\text{p53}]/K_{\text{p53}}) + 3(k_{f5}[\text{p21:MPF}] - k_{r5}[\text{MPF}][\text{p21}]^3) - k_{d5}[\text{p21}]$ <p>[p21](0)=0</p>                                                                                                                                                                                                                                                   | (5) |
| $\frac{1}{\tau} \frac{d[\text{p21:MPF}]}{dt} = k_{r5}[\text{MPF}][\text{p21}]^3 - k_{f5}[\text{p21:MPF}]$ $- k_{d6} \left( \frac{[\text{APC/CP:Cdc20}]}{K_{\text{p21MPF}} + [\text{p21:MPF}]} \right) [\text{p21:MPF}]$ <p>[p21:MPF](0)=0</p>                                                                                                                                                                                               | (6) |
| $\frac{1}{\tau} \frac{d[\text{Cdc25P}]}{dt} = k_{f3}[\text{Cdc25}] - k_{r3} \frac{[\text{Cdc25P}]}{K_{\text{Cdc25P1}} + [\text{Cdc25P}]}$ $- \left( k_{d7.1} + k_{d7.3} \frac{[\text{APC/CT:Cdh1}]}{K_{\text{Cdc25P2}} + [\text{Cdc25P}]} \right) [\text{Cdc25P}]$ <p><math>k_{f3} = k'_{f3}[\text{MPF}] + k''_{f3}[\text{Plk1P}]</math>, <math>k_{r3} = k'_{r3}[\text{PP2A}]</math>, as in Supplementary Table 1.</p> <p>[Cdc25P](0)=0</p> | (7) |
| $\frac{1}{\tau} \frac{d[\text{Cdc25}]}{dt} = k_{s8} \frac{K_{A2}}{K_{A2} + [\text{ATM/ATR}]} - k_{f3}[\text{Cdc25}] + k_{r3} \frac{[\text{Cdc25P}]}{K_{\text{Cdc25P1}} + [\text{Cdc25P}]}$ $- \left( k_{d8.1} + k_{d8.3} \frac{[\text{APC/CT:Cdh1}]}{K_{\text{Cdc25}} + [\text{Cdc25}]} \right) [\text{Cdc25}]$ <p>[Cdc25](0)=1</p>                                                                                                         | (8) |

|                                                                                                                                                                                                                                                                                                                                                                                                                                                                                                                                 |      |
|---------------------------------------------------------------------------------------------------------------------------------------------------------------------------------------------------------------------------------------------------------------------------------------------------------------------------------------------------------------------------------------------------------------------------------------------------------------------------------------------------------------------------------|------|
| $\frac{1}{\tau} \frac{d[\text{Wee1}]}{dt} = k_{s9} + k_{r4} \frac{[\text{Wee1P}]}{K_{\text{Wee1P}} + [\text{Wee1P}]} - k_{f4}[\text{Wee1}] - k_{d9}[\text{Wee1}]$ <p> <math>k_{f4} = k'_{f4}[\text{MPF}] + k''_{f4}[\text{Plk1P}], k_{r4} = k'_{r4}[\text{PP2A}],</math> as in Supplementary Table 1.<br/> <math>[\text{Wee1}](0)=1</math> </p>                                                                                                                                                                                 | (9)  |
| $\frac{1}{\tau} \frac{d[\text{Wee1P}]}{dt} = k_{f4}[\text{Wee1}] - k_{r4} \frac{[\text{Wee1P}]}{K_{\text{Wee1P}} + [\text{Wee1P}]} - k_{d10}[\text{Wee1P}]$ <p> <math>[\text{Wee1P}](0)=0</math> </p>                                                                                                                                                                                                                                                                                                                           | (10) |
| $\frac{1}{\tau} \frac{d[\text{Plk1P}]}{dt} = k_{f6}[\text{Plk1}] - k_{r6} \frac{[\text{Plk1P}]}{K_{\text{Plk1P1}} + [\text{Plk1P}]}$ $- \left( k_{d11.1} + k_{d11.3} \frac{[\text{APC/CT:Cdh1}]}{K_{\text{Plk1P2}} + [\text{Plk1P}]} \right) [\text{Plk1P}] - k_{f17}[\text{p53P}][\text{Plk1P}]$ $+ k_{r17}[\text{p53P:Plk1P}]$ <p> <math>k_{f6} = k'_{f6}[\text{MPF}] \frac{K_{A1}}{K_{A1} + [\text{ATM/ATR}]}, k_{r6} = k'_{r6}[\text{PP2A}],</math> as in Supplementary Table 1.<br/> <math>[\text{Plk1P}](0)=0</math> </p> | (11) |
| $\frac{1}{\tau} \frac{d[\text{Plk1}]}{dt} = k_{s12} + k_{r6} \frac{[\text{Plk1P}]}{K_{\text{Plk1P1}} + [\text{Plk1P}]} - k_{f6}[\text{Plk1}] - k_{d12.1}[\text{Plk1}]$ $- \left( k_{d12.3} \frac{[\text{APC/CT:Cdh1}]}{K_{\text{Plk1}} + [\text{Plk1}]} \right) [\text{Plk1}]$ <p> <math>[\text{Plk1}](0)=1</math> </p>                                                                                                                                                                                                         | (12) |
| $\frac{1}{\tau} \frac{d[\text{PP2A}]}{dt} = k_{s13} + k_{f7}[\text{PP2AP}] - k_{r7}[\text{PP2A}] - k_{d13}[\text{PP2A}]$ <p> <math>k_{r7} = k'_{r7}[\text{MPF}],</math> as in Supplementary Table 1.<br/> <math>[\text{PP2A}](0)=1</math> </p>                                                                                                                                                                                                                                                                                  | (13) |
| $\frac{1}{\tau} \frac{d[\text{PP2AP}]}{dt} = k_{r7}[\text{PP2A}] - k_{f7}[\text{PP2AP}] - k_{d14}[\text{PP2AP}]$ <p> <math>[\text{PP2AP}](0)=0</math> </p>                                                                                                                                                                                                                                                                                                                                                                      | (14) |

|                                                                                                                                                                                                                                                                                                                                                                                                                                                                                                                                                                                                                                                                                    |      |
|------------------------------------------------------------------------------------------------------------------------------------------------------------------------------------------------------------------------------------------------------------------------------------------------------------------------------------------------------------------------------------------------------------------------------------------------------------------------------------------------------------------------------------------------------------------------------------------------------------------------------------------------------------------------------------|------|
| $\frac{1}{\tau} \frac{d[\text{APC/C}]}{dt} = k_{s15} - k_{f8}[\text{APC/C}] + k_{r8} \frac{[\text{APC/CP}]}{K_{\text{APC/CP}} + [\text{APC/CP}]} + k_{r8}[\text{APC/CP:Cdc20}]$ $+ (k_{r11} + k_{r12})[\text{APC/C:Cdh1}] - k_{f12}[\text{APC/C}][\text{Cdh1}] - k_{d15}[\text{APC/C}]$ <p> <math>k_{f8} = k'_{f8}[\text{MPF}] + k''_{f8}[\text{Plk1P}]</math>, <math>k_{r8} = k'_{r8}[\text{PP2A}]</math>, as in Supplementary Table 1.<br/> <math>[\text{APC/C}](0)=1</math> </p>                                                                                                                                                                                                | (15) |
| $\frac{1}{\tau} \frac{d[\text{APC/CP}]}{dt} = k_{f8}[\text{APC/C}] - k_{r8} \frac{[\text{APC/CP}]}{K_{\text{APC/CP}} + [\text{APC/CP}]} - k_{f10}[\text{APC/CP}][\text{Cdc20}]$ $- k_{f13}[\text{APC/CP}][\text{Cdh1}] + (k_{r9} + k_{r10})[\text{APC/CP:Cdc20}]$ $+ (k_{r11} + k_{r13})[\text{APC/CP:Cdh1}] - k_{d16}[\text{APC/CP}]$ <p> <math>[\text{APC/CP}](0)=0</math> </p>                                                                                                                                                                                                                                                                                                  | (16) |
| $\frac{1}{\tau} \frac{d[\text{Cdc20}]}{dt} = k_{s17} + k_{f9} \frac{[\text{Cdc20P}]}{K_{\text{Cdc20P1}} + [\text{Cdc20P}]} - k_{r9}[\text{Cdc20}]$ $+ (k_{r8} + k_{r10})[\text{APC/CP:Cdc20}] - k_{f10}[\text{Cdc20}][\text{APC/CP}]$ $- \left( k_{d17.1} + k_{d17.3} \frac{[\text{APC/CT:Cdh1}]}{K_{\text{Cdc20}} + [\text{Cdc20}]} \right) [\text{Cdc20}]$ <p> <math>k_{s17} = 0</math>, when <math>\text{Mad2:Cdc20P} \geq 0.6</math><br/> <math>[\text{Cdc20}](0)=1</math> </p>                                                                                                                                                                                                | (17) |
| $\frac{1}{\tau} \frac{d[\text{Cdc20P}]}{dt} = k_{r9}[\text{Cdc20}] - k_{f9} \frac{[\text{Cdc20P}]}{K_{\text{Cdc20P1}} + [\text{Cdc20P}]} + k_{r9}[\text{APC/CP:Cdc20}]$ $- k_{f18}[\text{Mad2}][\text{Cdc20P}] + k_{r18}[\text{Mad2:Cdc20P}]$ $- \left( k_{d18.1} + k_{d18.3} \frac{[\text{APC/CT:Cdh1}]}{K_{\text{Cdc20P2}} + [\text{Cdc20P}]} \right) [\text{Cdc20P}]$ <p> <math>k_{f9} = k'_{f9}[\text{PP2A}]</math>, <math>k_{r9} = k'_{r9}[\text{MPF}] + k''_{r9}[\text{Plk1P}]</math> and <math>k_{r18} = k'_{r18}(1 + [\text{p21}]/K_{\text{MCD}} + \epsilon[\text{Plk1P}]/K_{\text{MCD}})</math>, as in Supplementary Table 1.<br/> <math>[\text{Cdc20P}](0)=0</math> </p> | (18) |

|                                                                                                                                                                                                                                                                                                                                                                                                                                                                                                                                                   |      |
|---------------------------------------------------------------------------------------------------------------------------------------------------------------------------------------------------------------------------------------------------------------------------------------------------------------------------------------------------------------------------------------------------------------------------------------------------------------------------------------------------------------------------------------------------|------|
| $\frac{1}{\tau} \frac{d[\text{APC/CP:Cdc20}]}{dt} = k_{f10}[\text{APC/CP}][\text{Cdc20}] - (k_{r8} + k_{r9} + k_{r10})[\text{APC/CP:Cdc20}]$ <p>[APC/CP:Cdc20](0)=0</p>                                                                                                                                                                                                                                                                                                                                                                           | (19) |
| $\frac{1}{\tau} \frac{d[\text{Cdh1}]}{dt} = k_{s20} - k_{r11}[\text{Cdh1}] + k_{f11} \frac{[\text{Cdh1P}]}{K_{\text{Cdh1P}} + [\text{Cdh1P}]} + k_{r12}[\text{APC/C:Cdh1}]$ $- k_{f12}[\text{Cdh1}][\text{APC/C}] + k_{r13}[\text{APC/CP:Cdh1}] - k_{f13}[\text{Cdh1}][\text{APC/CP}]$ $- k_{d20}[\text{Cdh1}]$ <p><math>k_{f11} = k'_{f11}[\text{PP2A}] \frac{K_{\text{Pttg11}}}{K_{\text{Pttg11}} + [\text{Pttg1}]}</math>, <math>k_{r11} = k'_{r11}[\text{MPF}] + k''_{r11}[\text{Plk1P}]</math>, as in Supplementary Table 1. [Cdh1](0)=1</p> | (20) |
| $\frac{1}{\tau} \frac{d[\text{Cdh1P}]}{dt} = k_{r11}[\text{Cdh1}] - k_{f11} \frac{[\text{Cdh1P}]}{K_{\text{Cdh1P}} + [\text{Cdh1P}]} + k_{r11}[\text{APC/C:Cdh1}]$ $+ k_{r11}[\text{APC/CP:Cdh1}] - k_{d21}[\text{Cdh1P}]$ <p>[Cdh1P](0)=0</p>                                                                                                                                                                                                                                                                                                    | (21) |
| $\frac{1}{\tau} \frac{d[\text{APC/C:Cdh1}]}{dt}$ $= k_{f12}[\text{APC/C}][\text{Cdh1}] + k_{r8}[\text{APC/CP:Cdh1}]$ $- (k_{f8} + k_{r11} + k_{r12})[\text{APC/C:Cdh1}]$ <p>[APC/C:Cdh1](0)=0</p>                                                                                                                                                                                                                                                                                                                                                 | (22) |
| $\frac{1}{\tau} \frac{d[\text{APC/CP:Cdh1}]}{dt}$ $= k_{f13}[\text{APC/CP}][\text{Cdh1}] + k_{f8}[\text{APC/C:Cdh1}]$ $- (k_{r8} + k_{r11} + k_{r13})[\text{APC/CP:Cdh1}]$ <p>[APC/CP:Cdh1](0)=0</p>                                                                                                                                                                                                                                                                                                                                              | (23) |

|                                                                                                                                                                                                                                                                                                                                                                                                                                                                                                                                                                                                                                          |      |
|------------------------------------------------------------------------------------------------------------------------------------------------------------------------------------------------------------------------------------------------------------------------------------------------------------------------------------------------------------------------------------------------------------------------------------------------------------------------------------------------------------------------------------------------------------------------------------------------------------------------------------------|------|
| $\frac{1}{\tau} \frac{d[\text{Pttg1}]}{dt} = k_{s24} + k_{f14} \frac{[\text{Pttg1P}]}{K_{\text{Pttg1P1}} + [\text{Pttg1P}]} - k_{r14} [\text{Pttg1}]$ $- \left( k_{d24.1} + k_{d24.2} \frac{[\text{APC/CP:Cdc20}]}{K_{\text{Pttg1}} + [\text{Pttg1}]} \right) [\text{Pttg1}]$ <p> <math>k_{f14} = k'_{f14}[\text{PP2A}] + k''_{f14}[\text{Plk1P}]</math>, <math>k_{r14} = k'_{r14}[\text{MPF}]</math>, as in Supplementary Table 1.<br/> <math>[\text{Pttg1}](0)=1</math> </p>                                                                                                                                                           | (24) |
| $\frac{1}{\tau} \frac{d[\text{Pttg1P}]}{dt} = k_{r14} [\text{Pttg1}] - k_{f14} \frac{[\text{Pttg1P}]}{K_{\text{Pttg1P1}} + [\text{Pttg1P}]}$ $- \left( k_{d25.1} + k_{d25.2} \frac{[\text{APC/CP:Cdc20}]}{K_{\text{Pttg1P2}} + [\text{Pttg1P}]} \right) [\text{Pttg1P}]$ <p> <math>[\text{Pttg1P}](0)=0</math> </p>                                                                                                                                                                                                                                                                                                                      | (25) |
| $\frac{1}{\tau} \frac{d[\text{LMNAP}]}{dt} = k_{f15} [\text{LMNA}] - k_{f15} [\text{LMNAP}]$ <p> <math>k_{f15} = k'_{f15}[\text{MPF}]</math>, <math>\text{LMNA} = \text{LMNAT} - \text{LMNAP}</math>, where <math>\text{LMNAT} = 1</math>.<br/> <math>[\text{LMNAP}](0)=0</math> </p>                                                                                                                                                                                                                                                                                                                                                    | (26) |
| $\frac{1}{\tau} \frac{d[\text{ATM/ATR}]}{dt}$ $= k_{s27}(1 + K_{\text{DDS}}\text{Sig}) - \frac{k_{d27.1}[\text{ATM/ATR}][\text{Wip1}]^4}{K_{\text{Wip1}}^4 + [\text{Wip1}]^4} - k_{d27}[\text{ATM/ATR}]$ <p> When <math>[\text{Mad2:Cdc20P}] \geq 0.6</math>, <math>\text{DDS} = 200([\text{Mad2:Cdc20P}] - 0.6)</math><br/> When <math>[\text{Mad2:Cdc20P}] \geq 0.36</math>, <math>\text{DDS} = 200([\text{Mad2:Cdc20P}] - 0.36)</math><br/> When <math>[\text{Mad2:Cdc20P}] &lt; 0.36</math>, <math>\text{DDS} = 0</math><br/> <math>\text{Sig} = \text{DDS} e^{-0.00000001t}</math> </p> <p> <math>[\text{ATM/ATR}](0)=0</math> </p> | (27) |
| $\frac{1}{\tau} \frac{d[\text{p53}]}{dt} = k_{s28}(1 + [\text{ATM/ATR}]/K_{A3}) - k_{f16}[\text{p53}] + k_{r16}[\text{p53P}]$ $- k_{d28.1}[\text{p53}][\text{Mdm2}] - k_{d28}[\text{p53}]$                                                                                                                                                                                                                                                                                                                                                                                                                                               | (28) |

|                                                                                                                                                                                                                                                                                                                                                                                                        |      |
|--------------------------------------------------------------------------------------------------------------------------------------------------------------------------------------------------------------------------------------------------------------------------------------------------------------------------------------------------------------------------------------------------------|------|
| [p53](0)=0                                                                                                                                                                                                                                                                                                                                                                                             |      |
| $\frac{1}{\tau} \frac{d[\text{p53P}]}{dt} = k_{f16}[\text{p53}] - k_{r16}[\text{p53P}] + k_{r17}[\text{p53P:Plk1P}] - k_{f17}[\text{p53P}][\text{Plk1P}]$ $- k_{d29.1}[\text{p53P}][\text{Mdm2}] - k_{d29}[\text{p53P}]$ <p> <math>k_{f16} = k'_{r16} \frac{[\text{ATM/ATR}]^4}{K_{A4}^4 + [\text{ATM/ATR}]^4}</math>, <math>k_{r16} = k'_{r16}[\text{Wip1}]</math>, as in Supplementary Table 1. </p> | (29) |
| [p53P](0)=0                                                                                                                                                                                                                                                                                                                                                                                            |      |
| $\frac{1}{\tau} \frac{d[\text{p53P:Plk1P}]}{dt} = k_{f17}[\text{p53P}][\text{Plk1P}] - k_{r17}[\text{p53P:Plk1P}]$                                                                                                                                                                                                                                                                                     | (30) |
| [p53P:Plk1P](0)=0                                                                                                                                                                                                                                                                                                                                                                                      |      |
| $\frac{1}{\tau} \frac{d[\text{Mdm2}]}{dt} = k_{s31} + k_{s31.1}[\text{p53P}] - k_{d31.1}[\text{ATM/ATR}][\text{Mdm2}] - k_{d31}[\text{Mdm2}]$                                                                                                                                                                                                                                                          | (31) |
| [Mdm2](0)=0                                                                                                                                                                                                                                                                                                                                                                                            |      |
| $\frac{1}{\tau} \frac{d[\text{Wip1}]}{dt} = k_{s32} + k_{s32.1}[\text{p53P}] - k_{d32}[\text{Wip1}]$                                                                                                                                                                                                                                                                                                   | (32) |
| [Mdm2](0)=0                                                                                                                                                                                                                                                                                                                                                                                            |      |
| $\frac{1}{\tau} \frac{d[\text{Mad2}]}{dt} = k_{s33} - k_{f18}[\text{Mad2}][\text{Cdc20P}] + k_{r18}[\text{Mad2:Cdc20P}] - k_{d33}[\text{Mad2}]$ <p> <math>k_{r18} = k'_{r18}(1 + [\text{p21}]/K_{\text{MCD}} + \epsilon[\text{Plk1P}]/K_{\text{MCD}})</math>, as in Supplementary Table 1. </p>                                                                                                        | (33) |
| [Mad2](0)=1                                                                                                                                                                                                                                                                                                                                                                                            |      |
| $\frac{1}{\tau} \frac{d[\text{Mad2:Cdc20P}]}{dt} = k_{f18}[\text{Mad2}][\text{Cdc20P}] - k_{r18}[\text{Mad2:Cdc20P}]$                                                                                                                                                                                                                                                                                  | (34) |
| [Mad2:Cdc20P](0)=0                                                                                                                                                                                                                                                                                                                                                                                     |      |

**Supplementary Table 3. Model parameter definitions and values**

| No | Symbol     | Definition                                             | Value |
|----|------------|--------------------------------------------------------|-------|
| 1  | $k_{f1}$   | Forward rate constant for association of CycB and CDK1 | 18    |
| 2  | $k_{r1}$   | Reverse rate constant for dissociation of MPF          | 0.1   |
| 3  | $k'_{f2}$  | Dephosphorylation rate constant of preMPF by Cdc25P    | 10    |
| 4  | $k''_{f2}$ | Dephosphorylation rate constant of preMPF by Cdc25     | 0.2   |
| 5  | $k'_{r2}$  | Phosphorylation rate constant of MPF by Wee1           | 3     |
| 6  | $k''_{r2}$ | Phosphorylation rate constant of MPF by Wee1P          | 0.1   |
| 7  | $k'_{f3}$  | Phosphorylation rate constant of Cdc25 by MPF          | 1     |
| 8  | $k''_{f3}$ | Phosphorylation rate constant of Cdc25 by Plk1P        | 2     |
| 9  | $k'_{r3}$  | Dephosphorylation rate constant of Cdc25P by PP2A      | 0.54  |
| 10 | $k'_{f4}$  | Phosphorylation rate constant of Wee1 by MPF           | 1     |
| 11 | $k''_{f4}$ | Phosphorylation rate constant of Wee1 by Plk1P         | 2     |
| 12 | $k'_{r4}$  | Dephosphorylation rate constant of Wee1 by PP2A        | 0.2   |
| 13 | $k_{f5}$   | Forward rate constant for dissociation of p21:MPF      | 8     |
| 14 | $k_{r5}$   | Reverse rate constant for association of p21 and MPF   | 80    |
| 15 | $k'_{f6}$  | Phosphorylation rate constant of Plk1 by MPF           | 5     |
| 16 | $k'_{r6}$  | Dephosphorylation rate constant of Plk1P by PP2A       | 0.5   |
| 17 | $k_{f7}$   | Dephosphorylation rate constant of PP2AP               | 0.4   |
| 18 | $k_{r7}$   | Phosphorylation rate constant of PP2A by MPF           | 4     |
| 19 | $k'_{f8}$  | Phosphorylation rate constant of APC/C by MPF          | 0.1   |
| 20 | $k'_{f8}$  | Phosphorylation rate constant of APC/C by Plk1P        | 0.35  |
| 21 | $k'_{r8}$  | Dephosphorylation rate constant of APC/CP by PP2A      | 0.04  |

|    |             |                                                           |        |
|----|-------------|-----------------------------------------------------------|--------|
| 22 | $k'_{r9}$   | Phosphorylation rate constant of Cdc20 by MPF             | 11     |
| 23 | $k'_{r9}$   | Phosphorylation rate constant of Cdc20 by Plk1P           | 11     |
| 24 | $k'_{f9}$   | Dephosphorylation rate constant of Cdc20 by PP2A          | 20     |
| 25 | $k_{f10}$   | Forward rate constant for association of APC/CP and Cdc20 | 80     |
| 26 | $k_{r10}$   | Reverse rate constant for dissociation of APC/CP:Cdc20    | 20     |
| 27 | $k'_{f11}$  | Dephosphorylation rate constant of Cdh1P by PP2A          | 0.02   |
| 28 | $k'_{r11}$  | Phosphorylation rate constant of Cdh1 by MPF              | 22     |
| 29 | $k''_{r11}$ | Phosphorylation rate constant of Cdh1 by Plk1P            | 22     |
| 30 | $k_{f12}$   | Forward rate constant for association of APC/C and Cdh1   | 80     |
| 31 | $k_{r12}$   | Reverse rate constant for dissociation of APC/C:Cdh1      | 20     |
| 32 | $k_{f13}$   | Forward rate constant for association of APC/CP and Cdh1  | 80     |
| 33 | $k_{r13}$   | Reverse rate constant for dissociation of APC/CP:Cdh1     | 3      |
| 34 | $k'_{f14}$  | Dephosphorylation rate constant of Pttg1P by PP2A         | 0.01   |
| 35 | $k'_{r14}$  | Phosphorylation rate constant of Pttg1 by MPF             | 50     |
| 36 | $k'_{f15}$  | Phosphorylation rate constant of LMNA by MPF              | 1      |
| 37 | $k_{r15}$   | Dephosphorylation rate constant of LMNAP                  | 1      |
| 38 | $k'_{f16}$  | Phosphorylation rate constant of p53 by ATM/ATR           | 1      |
| 39 | $k'_{r16}$  | Dephosphorylation rate constant of p53P by Wip1           | 3      |
| 40 | $k_{f17}$   | Forward rate constant for association of Plk1P and p53P   | 80     |
| 41 | $k_{r17}$   | Reverse rate constant for association of Plk1P:p53P       | 20     |
| 42 | $k_{f18}$   | Forward rate constant for association of Mad2 and Cdc20P  | 20     |
| 43 | $k'_{r18}$  | Reverse rate constant for dissociation of Mad2:Cdc20P     | 0.1    |
| 44 | $k_{s1}$    | CycB synthesis rate constant                              | 0.1    |
| 45 | $k_{s5}$    | p21 synthesis rate constant influenced by p53             | 0.0001 |
| 46 | $k_{s8}$    | Cdc25 synthesis rate constant                             | 0.1    |
| 47 | $k_{s9}$    | Wee1 synthesis rate constant                              | 0.1    |



|    |             |                                                          |        |
|----|-------------|----------------------------------------------------------|--------|
| 48 | $k_{s12}$   | Plk1 synthesis rate constant                             | 0.1    |
| 49 | $k_{s13}$   | PP2A synthesis rate constant                             | 0.1    |
| 50 | $k_{s15}$   | APC/C synthesis rate constant                            | 0.1    |
| 51 | $k_{s17}$   | Cdc20 synthesis rate constant                            | 0.1    |
| 52 | $k_{s20}$   | Cdh1 synthesis rate constant                             | 0.1    |
| 53 | $k_{s24}$   | Pttg1 synthesis rate constant                            | 0.1    |
| 54 | $k_{s27}$   | ATM/ATR synthesis rate constant influenced by DDS        | 0.0001 |
| 55 | $k_{s28}$   | p53 synthesis rate constant influenced by ATM/ATR        | 0.0001 |
| 56 | $k_{s31}$   | Mdm2 synthesis rate constant                             | 0.0001 |
| 57 | $k_{s31.1}$ | p53P-dependent Mdm2 synthesis rate constant              | 6      |
| 58 | $k_{s32}$   | Wip1 synthesis rate constant                             | 0.0001 |
| 59 | $k_{s32.1}$ | p53P-dependent Wip1 synthesis rate constant              | 6      |
| 60 | $k_{s33}$   | Mad2 synthesis rate constant                             | 0.1    |
| 61 | $k_{d1.1}$  | CycB self-degradation rate constant                      | 0.3    |
| 62 | $k_{d1.2}$  | CycB degradation rate constant by APC/CP:Cdc20           | 1      |
| 63 | $k_{d1.3}$  | CycB degradation rate constant by APC/CT:Cdh1            | 1      |
| 64 | $k_{d3.1}$  | MPF self-degradation rate constant                       | 0.01   |
| 65 | $k_{d3.2}$  | MPF degradation rate constant by APC/CP:Cdc20            | 1      |
| 66 | $k_{d3.3}$  | MPF degradation rate constant by APC/CT:Cdh1             | 1      |
| 67 | $k_{d4.1}$  | preMPF self-degradation rate constant                    | 0.01   |
| 68 | $k_{d4.2}$  | preMPF degradation rate constant by APC/CP:Cdc20         | 1      |
| 69 | $k_{d4.3}$  | preMPF degradation rate constant by APC/CT:Cdh1          | 1      |
| 70 | $k_{d5}$    | p21 self-degradation rate constant                       | 0.01   |
| 71 | $k_{d6}$    | p21 degradation rate constant in p21:MPF by APC/CP:Cdc20 | 1      |
| 72 | $k_{d7.1}$  | Cdc25P self-degradation rate constant                    | 0.18   |
| 73 | $k_{d7.3}$  | Cdc25P degradation rate constant by APC/CT:Cdh1          | 0.1    |
| 74 | $k_{d8.1}$  | Cdc25 self-degradation rate constant                     | 0.08   |
| 75 | $k_{d8.3}$  | Cdc25 degradation rate constant by APC/CT:Cdh1           | 1      |
| 76 | $k_{d9}$    | Wee1 self-degradation rate constant                      | 0.1    |
| 77 | $k_{d10}$   | Wee1P self-degradation rate constant                     | 1      |
| 78 | $k_{d11.1}$ | Plk1P self-degradation rate constant                     | 0.1    |
| 79 | $k_{d11.3}$ | Plk1P degradation rate constant by APC/CT:Cdh1           | 1.5    |

|     |              |                                                    |        |
|-----|--------------|----------------------------------------------------|--------|
| 80  | $k_{d12.1}$  | Plk1 self-degradation rate constant                | 0.2    |
| 81  | $k_{d12.3}$  | Plk1 degradation rate constant by APC/CT:Cdh1      | 1.5    |
| 82  | $k_{d13}$    | PP2A self-degradation rate constant                | 0.1    |
| 83  | $k_{d14}$    | PP2AP self-degradation rate constant               | 0.1    |
| 84  | $k_{d15}$    | APC/C self-degradation rate constant               | 0.2    |
| 85  | $k_{d16}$    | APC/CP self-degradation rate constant              | 0.1    |
| 86  | $k_{d17.1}$  | Cdc20 self-degradation rate constant               | 0.2    |
| 87  | $k_{d17.3}$  | Cdc20 degradation rate constant by APC/CT:Cdh1     | 1.5    |
| 88  | $k_{d18.1}$  | Cdc20P self-degradation rate constant              | 0.2    |
| 89  | $k_{d18.3}$  | Cdc20P degradation rate constant by APC/CT:Cdh1    | 1.5    |
| 90  | $k_{d20}$    | Cdh1 self-degradation rate constant                | 0.2    |
| 91  | $k_{d21}$    | Cdh1P self-degradation rate constant               | 0.2    |
| 92  | $k_{d24.1}$  | Pttg1 self-degradation rate constant               | 0.1    |
| 93  | $k_{d24.2}$  | Pttg1 degradation rate constant by APC/CP:Cdc20    | 1      |
| 94  | $k_{d25.1}$  | Pttg1P self-degradation rate constant              | 0.1    |
| 95  | $k_{d25.2}$  | Pttg1P degradation rate constant by APC/CP:Cdc20   | 1      |
| 96  | $k_{d27}$    | ATM/ATR self-degradation rate constant             | 0.1    |
| 97  | $k_{d27.1}$  | Saturating Wip1-dependent ATM/ATR degradation rate | 100    |
| 98  | $k_{d28}$    | p53 self-degradation rate constant                 | 0.2    |
| 99  | $k_{d28.1}$  | Mdm2-dependent p53 degradation rate                | 1      |
| 100 | $k_{d28}$    | p53P degradation rate constant                     | 0.2    |
| 101 | $k_{d29.1}$  | Mdm2-dependent p53P degradation rate               | 1      |
| 102 | $k_{d31.1}$  | ATM/ATR dependent Mdm2 inactivation rate           | 1      |
| 103 | $k_{d31}$    | Mdm2 degradation rate constant                     | 0.2    |
| 104 | $k_{d32}$    | Wip1 degradation rate constant                     | 5      |
| 105 | $k_{d33}$    | Mad2 degradation rate constant                     | 0.2    |
| 106 | $K_{A1}$     | Intensifying scale rate of $k'_{f6}$ by ATM_ATR    | 1      |
| 107 | $K_{Pttg11}$ | Intensifying scale rate of $k'_{f11}$ by Pttg1     | 0.5    |
| 108 | $K_{A2}$     | Intensifying scale rate of $k_{s8}$ by ATM/ATR     | 1      |
| 109 | $K_{p53}$    | Intensifying scale rate of $k_{s5}$ by p53         | 0.001  |
| 110 | $K_{DDS}$    | Intensifying scale rate of DDS                     | 1000   |
| 111 | $K_{A3}$     | Intensifying scale rate of $k_{s28}$ by ATM_ATR    | 0.0002 |

|     |               |                                                            |      |
|-----|---------------|------------------------------------------------------------|------|
|     |               |                                                            |      |
| 112 | $K_{MCD}$     | Intensifying scale rate_of Mad2_Cdc20P dissociation by p21 | 0.01 |
| 113 | $\epsilon$    | Intensifying scale ratio of Plk1/p21                       | 1    |
| 114 | $K_{CycB1}$   | MM constant of CycB degradation by APC/CP:Cdc20            | 0.1  |
| 115 | $K_{CycB2}$   | MM constant of CycB degradation by APC/CP:Cdh1             | 0.1  |
| 116 | $K_{MPF1}$    | MM constant of MPF degradation by APC/CP:Cdc20             | 0.1  |
| 117 | $K_{MPF2}$    | MM constant of MPF degradation by APC/CT:Cdh1              | 0.1  |
| 118 | $K_{preMPF1}$ | MM constant of MPF degradation by APC/CP:Cdc20             | 0.1  |
| 119 | $K_{preMPF2}$ | MM constant of MPF degradation by APC/CP:Cdh1              | 0.1  |
| 120 | $K_{p21MPF}$  | MM constant of p21:MPF degradation by APC/CP:Cdc20         | 0.1  |
| 121 | $K_{Cdc25P1}$ | MM constant of Cdc25CP Dephosphorylation by PP2A           | 0.1  |
| 122 | $K_{Cdc25P2}$ | MM constant of Cdc25P degradation by APC/CT:Cdh1           | 0.1  |
| 123 | $K_{Cdc25}$   | MM constant of Cdc25 degradation by APC/CT:Cdh1            | 0.1  |
| 124 | $K_{Wee1P}$   | MM constant of Wee1P dephosphorylation by PP2A             | 0.1  |
| 125 | $K_{Plk1P1}$  | MM constant of Plk1P dephosphorylation by PP2A             | 0.1  |
| 126 | $K_{Plk1P2}$  | MM constant of Plk1P degradation by APC/CT:Cdh1            | 0.1  |
| 127 | $K_{Plk1}$    | MM constant of Plk1 degradation by APC/CT:Cdh1             | 0.1  |
| 128 | $K_{APC/CP}$  | MM constant of APC/CP dephosphorylation by PP2A            | 0.1  |
| 129 | $K_{Cdc20P1}$ | MM constant of Cdc20P dephosphorylation by PP2A            | 0.1  |
| 130 | $K_{Cdc20}$   | MM constant of Cdc20 degradation by APC/CT:Cdh1            | 0.1  |
| 131 | $K_{Cdc20P2}$ | MM constant of Cdc20P degradation by APC/CT:Cdh1           | 0.1  |
| 132 | $K_{Cdh1P}$   | MM constant of Cdh1P dephosphorylation by PP2A             | 0.1  |
| 133 | $K_{Pttg1P1}$ | MM constant of Pttg1P dephosphorylation by PP2A            | 0.1  |
| 134 | $K_{Pttg1}$   | MM constant of Pttg1 degradation by APC/CP:Cdc20           | 0.1  |
| 135 | $K_{Pttg1P2}$ | MM constant of Pttg1P degradation by APC/CP:Cdc20          | 0.1  |
| 136 | $K_{A4}$      | MM constant of p53 phosphorylation by Wip1                 | 0.5  |
| 137 | $K_{Wip1}$    | MM constant of ATM/ATR signal degradation by Wip1          | 0.5  |

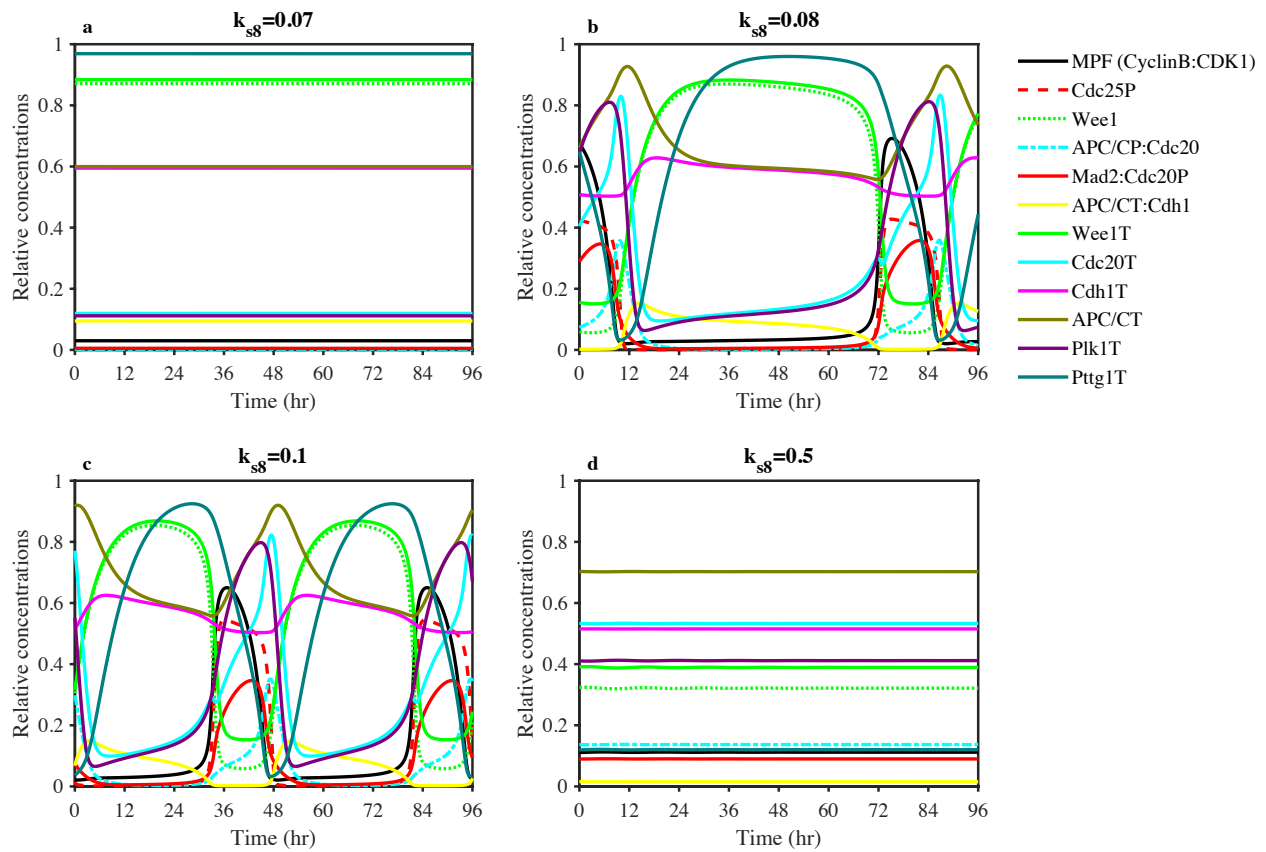

**Supplementary Figure 1.** Numerical simulation results obtained using four different  $k_{s8}$  parameter values: (a) 0.07, (b) 0.08, (c) 0.1, and (d) 0.5. Dynamics of cell cycle components shows that limit cycle oscillations exist when  $k_{s8}$  is between 0.08 and 0.1 but not for values less than or equal to 0.07 and greater than or equal to 0.5.

**Supplementary Table 4. Parameter ranges for the model to exhibit limit cycle oscillations**

| No | Symbol     | Value | Left endpoint | Right endpoint |
|----|------------|-------|---------------|----------------|
| 1  | $k_{f1}$   | 18    | 10            | 191            |
| 2  | $k_{r1}$   | 0.1   | 0             | 3.1            |
| 3  | $k'_{f2}$  | 10    | 0.3           | 120            |
| 4  | $k''_{f2}$ | 0.2   | 0.1           | 2              |
| 5  | $k'_{r2}$  | 3     | 1             | 3              |
| 6  | $k''_{r2}$ | 0.1   | 0             | 26             |
| 7  | $k'_{f3}$  | 1     | 0             | 9              |
| 8  | $k''_{f3}$ | 2     | 0             | 49             |
| 9  | $k'_{r3}$  | 0.54  | 0.07          | >1000          |
| 10 | $k'_{f4}$  | 1     | 0             | 15             |
| 11 | $k''_{f4}$ | 2     | 0             | 25             |
| 12 | $k'_{r4}$  | 0.2   | 0             | 3.4            |
| 13 | $k_{f5}$   | 8     | 0             | >1000          |
| 14 | $k_{r5}$   | 80    | 0             | >1000          |
| 15 | $k'_{f6}$  | 5     | 1             | 14             |
| 16 | $k'_{r6}$  | 0.5   | 0.1           | 16.4           |
| 17 | $k_{f7}$   | 0.4   | 0.2           | >1000          |
| 18 | $k'_{r7}$  | 4     | 0             | 6              |
| 19 | $k'_{f8}$  | 0.1   | 0             | 0.4            |
| 20 | $k''_{f8}$ | 0.35  | 0.05          | 1.9            |
| 21 | $k'_{r8}$  | 0.04  | 0.01          | 0.13           |
| 22 | $k'_{r9}$  | 11    | 0             | >1000          |
| 23 | $k''_{r9}$ | 11    | 0             | >1000          |
| 24 | $k'_{f9}$  | 20    | 0             | >1000          |
| 25 | $k_{f10}$  | 80    | 0             | 400            |
| 26 | $k_{r10}$  | 20    | 4             | 58             |

|    |             |        |     |         |
|----|-------------|--------|-----|---------|
| 27 | $k'_{f11}$  | 0.02   | 0   | 0.03    |
| 28 | $k'_{r11}$  | 22     | 20  | >1000   |
| 29 | $k''_{r11}$ | 22     | 0   | >1000   |
| 30 | $k_{f12}$   | 80     | 0   | 104     |
| 31 | $k_{r12}$   | 20     | 16  | >1000   |
| 32 | $k_{f13}$   | 80     | 0   | 848     |
| 33 | $k_{r13}$   | 3      | 0   | >1000   |
| 34 | $k'_{f14}$  | 0.01   | 0   | >1000   |
| 35 | $k'_{r14}$  | 50     | 0   | >1000   |
| 36 | $k'_{f15}$  | 1      | 0   | >1000   |
| 37 | $k_{r15}$   | 1      | 0   | >1000   |
| 38 | $k'_{f16}$  | 1      | 0   | >1000   |
| 39 | $k'_{r16}$  | 3      | 0   | >1000   |
| 40 | $k_{f17}$   | 80     | 0   | >1000   |
| 41 | $k_{r17}$   | 20     | 0   | >1000   |
| 42 | $k_{f18}$   | 20     | 0   | >1000   |
| 43 | $k'_{r18}$  | 0.1    | 0   | >1000   |
| 44 | $k_{s1}$    | 0.1    | 0.1 | 0.1     |
| 45 | $k_{s5}$    | 0.0001 | 0   | 0.0073  |
| 46 | $k_{s8}$    | 0.1    | 0.1 | 0.3     |
| 47 | $k_{s9}$    | 0.1    | 0.1 | 0.1     |
| 48 | $k_{s12}$   | 0.1    | 0.1 | 0.1     |
| 49 | $k_{s13}$   | 0.1    | 0   | 0.1     |
| 50 | $k_{s15}$   | 0.1    | 0   | 0.1     |
| 51 | $k_{s17}$   | 0.1    | 0.1 | 0.2     |
| 52 | $k_{s20}$   | 0.1    | 0   | 0.1     |
| 53 | $k_{s24}$   | 0.1    | 0   | >1000   |
| 54 | $k_{s27}$   | 0.0001 | 0   | 10      |
| 55 | $k_{s28}$   | 0.0001 | 0   | 0.00981 |

|    |             |        |     |       |
|----|-------------|--------|-----|-------|
| 56 | $k_{s31}$   | 0.0001 | 0   | >1000 |
| 57 | $k_{s31p}$  | 6      | 0   | >1000 |
| 58 | $k_{s32}$   | 0.0001 | 0   | 10    |
| 59 | $k_{s32p}$  | 6      | 0   | >1000 |
| 60 | $k_{s33}$   | 0.1    | 0   | >1000 |
| 61 | $k_{d1.1}$  | 0.3    | 0   | 1.4   |
| 62 | $k_{d1.2}$  | 1      | 0   | 49    |
| 63 | $k_{d1.3}$  | 1      | 0   | 2     |
| 64 | $k_{d3.1}$  | 0.01   | 0   | 0.23  |
| 65 | $k_{d3.2}$  | 1      | 1   | 8     |
| 66 | $k_{d3.3}$  | 1      | 0   | 1     |
| 67 | $k_{d4.1}$  | 0.01   | 0   | 0.16  |
| 68 | $k_{d4.2}$  | 1      | 0   | 4     |
| 69 | $k_{d4.3}$  | 1      | 0   | 1     |
| 70 | $k_{d5}$    | 0.01   | 0   | >1000 |
| 71 | $k_{d6}$    | 1      | 0   | >1000 |
| 72 | $k_{d7.1}$  | 0.18   | 0   | >1000 |
| 73 | $k_{d7.3}$  | 0.1    | 0   | >1000 |
| 74 | $k_{d8.1}$  | 0.08   | 0   | 0.24  |
| 75 | $k_{d8.3}$  | 1      | 0   | 1     |
| 76 | $k_{d9}$    | 0.1    | 0.1 | 0.5   |
| 77 | $k_{d10}$   | 1      | 1   | >1000 |
| 78 | $k_{d11.1}$ | 0.1    | 0   | 92.7  |
| 79 | $k_{d11.3}$ | 1.5    | 0   | 96.5  |
| 80 | $k_{d12.1}$ | 0.2    | 0   | 18.5  |
| 81 | $k_{d12.3}$ | 1.5    | 0   | 21.2  |
| 82 | $k_{d13}$   | 0.1    | 0   | 0.4   |
| 83 | $k_{d14}$   | 0.1    | 0   | 0.2   |
| 84 | $k_{d15}$   | 0.2    | 3   | >1000 |

|     |               |        |        |       |
|-----|---------------|--------|--------|-------|
| 85  | $k_{d16}$     | 0.1    | 0      | >1000 |
| 86  | $k_{d17.1}$   | 0.2    | 0      | 0.9   |
| 87  | $k_{d17.3}$   | 1.5    | 0      | 14    |
| 88  | $k_{d18.1}$   | 0.2    | 0      | 0.6   |
| 89  | $k_{d18.3}$   | 1.5    | 0      | 48.6  |
| 90  | $k_{d20}$     | 0.2    | 0.1    | >1000 |
| 91  | $k_{d21}$     | 0.2    | 0      | >1000 |
| 92  | $k_{d24.1}$   | 0.1    | 0      | >1000 |
| 93  | $k_{d24.2}$   | 1      | 0      | >1000 |
| 94  | $k_{d25.1}$   | 0.1    | 0      | >1000 |
| 95  | $k_{d25.2}$   | 1      | 0      | >1000 |
| 96  | $k_{d27}$     | 0.1    | 0      | >1000 |
| 97  | $k_{d27p}$    | 100    | 0      | >1000 |
| 98  | $k_{d28}$     | 0.2    | 0      | >1000 |
| 99  | $k_{d28p}$    | 1      | 0      | >1000 |
| 100 | $k_{d29}$     | 0.2    | 0      | >1000 |
| 101 | $k_{d29p}$    | 1      | 0      | >1000 |
| 102 | $k_{d31.1}$   | 1      | 0      | >1000 |
| 103 | $k_{d31}$     | 0.2    | 0      | >1000 |
| 104 | $k_{d32}$     | 5      | 0      | >1000 |
| 105 | $k_{d33}$     | 0.2    | 0      | >1000 |
| 106 | $K_{A1}$      | 1      | 1      | >1000 |
| 107 | $K_{Pttg1}$   | 0.5    | 0      | >1000 |
| 108 | $K_{A2}$      | 1      | 1      | >1000 |
| 109 | $K_{p53}$     | 0.001  | 0.001  | 100   |
| 110 | $K_{DDS}$     | 1000   | 0      | >1000 |
| 111 | $K_{A3}$      | 0.0002 | 0.0001 | >1000 |
| 112 | $K_{MCD}$     | 0.01   | 0.01   | >1000 |
| 113 | $\varepsilon$ | 1      | 0      | >1000 |



|     |               |     |     |       |
|-----|---------------|-----|-----|-------|
| 114 | $K_{CycB1}$   | 0.1 | 0.1 | >1000 |
| 115 | $K_{CycB2}$   | 0.1 | 0.1 | >1000 |
| 116 | $K_{MPF1}$    | 0.1 | 0.1 | 0.9   |
| 117 | $K_{MPF2}$    | 0.1 | 0.1 | >1000 |
| 118 | $K_{preMPF1}$ | 0.1 | 0.1 | >1000 |
| 119 | $K_{preMPF2}$ | 0.1 | 0.1 | >1000 |
| 120 | $K_{p21MPF}$  | 0.1 | 0.1 | >1000 |
| 121 | $K_{Cdc25P1}$ | 0.1 | 0.1 | 1.2   |
| 122 | $K_{Cdc25P2}$ | 0.1 | 0.1 | >1000 |
| 123 | $K_{Cdc25}$   | 0.1 | 0.1 | >1000 |
| 124 | $K_{Wee1P}$   | 0.1 | 0.1 | >1000 |
| 125 | $K_{Plk1P1}$  | 0.1 | 0.1 | 0.4   |
| 126 | $K_{Plk1P2}$  | 0.1 | 0.1 | >1000 |
| 127 | $K_{Plk1}$    | 0.1 | 0.1 | >1000 |
| 128 | $K_{APC/CP}$  | 0.1 | 0.1 | >1000 |
| 129 | $K_{Cdc20P1}$ | 0.1 | 0.1 | 0.4   |
| 130 | $K_{Cdc20}$   | 0.1 | 0.1 | >1000 |
| 131 | $K_{Cdc20P2}$ | 0.1 | 0.1 | >1000 |
| 132 | $K_{Cdh1P}$   | 0.1 | 0.1 | >1000 |
| 133 | $K_{Pttg1P1}$ | 0.1 | 0.1 | >1000 |
| 134 | $K_{Pttg1}$   | 0.1 | 0   | >1000 |
| 135 | $K_{Pttg1P2}$ | 0.1 | 0.1 | >1000 |
| 136 | $K_{A4}$      | 0.5 | 0.1 | >1000 |
| 137 | $K_{Wip1}$    | 0.5 | 0.1 | >1000 |

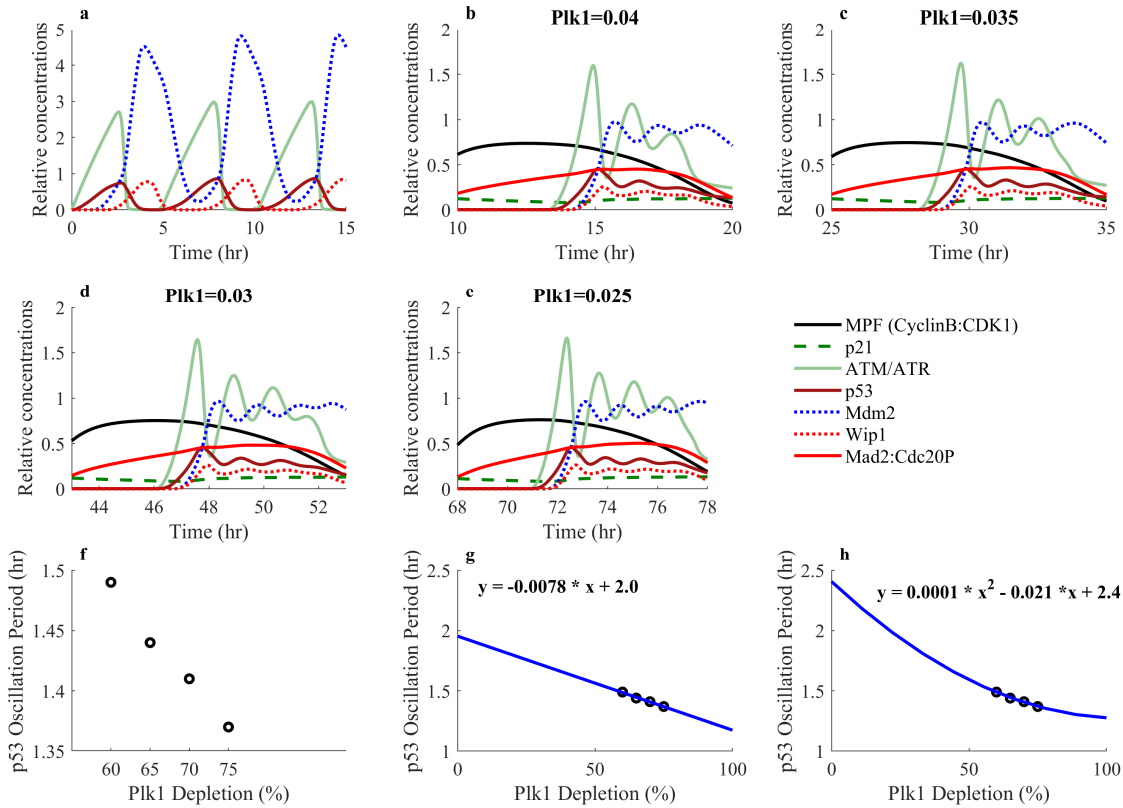

**Supplementary Figure 2.** The period of oscillations of ATM/ATR, p53, Wip1, Mdm2 regulators. (a) When ATM/ATR-p53-Wip1-Mdm2 subnetwork is disconnected from the cell cycle regulation it produces oscillations with a period of ~5hrs. (b-f) Oscillations in p53 regulation that is connected with the cell cycle regulation (our full model). The period of oscillations depends on the level of Plk1 depletion that induces the activation of DNA damage checkpoint. (f) The dependence of the period of p53 oscillations on the level of Plk1 depletion. (g-h) Fitting and extrapolation the dependence of p53 oscillation period on Plk1 depletion level using a linear and polynomial functions. Oscillations can be resolved only at high level of Plk1 depletion, when DNA damage checkpoint is activated. The extrapolation to lower Plk1 depletion values shows the expected period of oscillations at lower levels of Plk1 depletion.

**Supplementary Table 5.** The number of different cancer cell lines that carry a specific gene mutation from Dependency Map database (depmap.org) and the number of cell lines for which CRISPR data are available.

| Gene        | Number of different cancer cell lines that carry a corresponding gene mutation | Number of different cancer cell lines that carry a corresponding gene mutation and for which CRISPR data are available |
|-------------|--------------------------------------------------------------------------------|------------------------------------------------------------------------------------------------------------------------|
| TP53        | 1091                                                                           | 549                                                                                                                    |
| ATM         | 267                                                                            | 136                                                                                                                    |
| ATR         | 184                                                                            | 92                                                                                                                     |
| PPM1D       | 78                                                                             | 28                                                                                                                     |
| FZR1        | 74                                                                             | 34                                                                                                                     |
| CDC25B      | 62                                                                             | 24                                                                                                                     |
| CDC27       | 59                                                                             | 29                                                                                                                     |
| PLK1        | 58                                                                             | 31                                                                                                                     |
| LMNA        | 51                                                                             | 26                                                                                                                     |
| CDC16       | 48                                                                             | 20                                                                                                                     |
| CDC23       | 39                                                                             | 20                                                                                                                     |
| CDC25A      | 39                                                                             | 15                                                                                                                     |
| CDKN1A      | 39                                                                             | 23                                                                                                                     |
| CDC25C      | 37                                                                             | 14                                                                                                                     |
| CDC20       | 35                                                                             | 18                                                                                                                     |
| MDM2        | 34                                                                             | 20                                                                                                                     |
| WEE1        | 34                                                                             | 17                                                                                                                     |
| CCNB1       | 27                                                                             | 14                                                                                                                     |
| CCNB2       | 24                                                                             | 9                                                                                                                      |
| PPP2CA      | 23                                                                             | 11                                                                                                                     |
| PTTG1       | 20                                                                             | 14                                                                                                                     |
| MAD2L1      | 18                                                                             | 6                                                                                                                      |
| MAD2L2      | 18                                                                             | 9                                                                                                                      |
| ATM-TP53    | 190                                                                            | 106                                                                                                                    |
| ATR-TP53    | 128                                                                            | 63                                                                                                                     |
| FZR1-TP53   | 56                                                                             | 23                                                                                                                     |
| PPM1D-TP53  | 56                                                                             | 21                                                                                                                     |
| ATM-ATR     | 53                                                                             | 29                                                                                                                     |
| CDC25B-TP53 | 43                                                                             | 18                                                                                                                     |
| CDC27-TP53  | 41                                                                             | 21                                                                                                                     |
| ATM-FZR1    | 39                                                                             | 20                                                                                                                     |
| PLK1-TP53   | 39                                                                             | 24                                                                                                                     |
| LMNA-TP53   | 34                                                                             | 16                                                                                                                     |
| CDC16-TP53  | 33                                                                             | 17                                                                                                                     |
| CDC23-TP53  | 31                                                                             | 16                                                                                                                     |

|             |    |    |
|-------------|----|----|
| CDKN1A-TP53 | 29 | 17 |
| CDC20-TP53  | 28 | 15 |
| MDM2-TP53   | 28 | 15 |
| ATM-PPM1D   | 27 | 9  |
| CDC25A-TP53 | 27 | 12 |
| ATM-CDC25B  | 23 | 9  |
| CDC25C-TP53 | 22 | 8  |
| ATR-FZR1    | 21 | 9  |
| TP53-WEE1   | 21 | 12 |
| ATM-CDC23   | 20 | 8  |
| ATR-PPM1D   | 20 | 6  |
| ATM-CDC27   | 19 | 11 |
| CCNB2-TP53  | 19 | 9  |
| ATM-PLK1    | 18 | 9  |
| ATR-CDC25B  | 17 | 7  |
| PTTG1-TP53  | 17 | 13 |
| ATM-CDC25A  | 16 | 6  |
| ATR-LMNA    | 16 | 5  |
| ATM-CDC16   | 15 | 6  |
| ATM-CDC20   | 15 | 8  |
| ATM-LMNA    | 15 | 7  |
| ATM-MDM2    | 15 | 5  |
| ATR-CDC23   | 15 | 6  |
| FZR1-PLK1   | 15 | 9  |
| PPP2CA-TP53 | 15 | 7  |
| ATR-CDC27   | 14 | 8  |
| CCNB1-TP53  | 14 | 8  |
| CDC25A-FZR1 | 14 | 5  |
| ATM-CDC25C  | 13 | 4  |
| ATR-PLK1    | 13 | 8  |
| MAD2L1-TP53 | 13 | 5  |
| ATM-CCNB2   | 12 | 4  |
| ATM-CDKN1A  | 12 | 7  |
| ATM-WEE1    | 12 | 7  |
| ATR-CDC25A  | 12 | 4  |
| ATR-CDC25C  | 12 | 3  |
| ATR-CDKN1A  | 12 | 6  |
| ATR-MDM2    | 12 | 4  |
| CDC25B-FZR1 | 12 | 3  |
| FZR1-PPM1D  | 12 | 3  |
| MAD2L2-TP53 | 12 | 7  |

|               |    |   |
|---------------|----|---|
| ATM-PPP2CA    | 11 | 2 |
| ATM-PTTG1     | 11 | 9 |
| ATR-CDC16     | 11 | 3 |
| ATR-WEE1      | 11 | 5 |
| CDC20-FZR1    | 11 | 5 |
| CDC25C-PPM1D  | 10 | 1 |
| CDC27-FZR1    | 10 | 5 |
| ATR-CDC20     | 9  | 5 |
| CDC16-FZR1    | 9  | 4 |
| CDC23-FZR1    | 9  | 1 |
| CDC25A-LMNA   | 9  | 4 |
| CDC27-PLK1    | 9  | 6 |
| MDM2-PPM1D    | 9  | 2 |
| ATM-MAD2L1    | 8  | 3 |
| ATR-CCNB1     | 8  | 5 |
| ATR-PPP2CA    | 8  | 4 |
| CDC20-WEE1    | 8  | 5 |
| CDC25A-CDC25B | 8  | 1 |
| CDC25B-PLK1   | 8  | 5 |
| CDKN1A-FZR1   | 8  | 4 |
| FZR1-LMNA     | 8  | 2 |
| ATM-MAD2L2    | 7  | 4 |
| ATR-MAD2L2    | 7  | 2 |
| CDC20-CDC25B  | 7  | 3 |
| CDC20-PPM1D   | 7  | 2 |
| CDC25A-CDC27  | 7  | 3 |
| CDC25B-CDC27  | 7  | 3 |
| CDC25B-WEE1   | 7  | 3 |
| CDC25C-CDKN1A | 7  | 4 |
| CDC25C-LMNA   | 7  | 2 |
| CDKN1A-PPM1D  | 7  | 3 |
| FZR1-PTTG1    | 7  | 5 |
| FZR1-WEE1     | 7  | 3 |
| MDM2-PLK1     | 7  | 4 |
| PLK1-PPM1D    | 7  | 1 |
| PLK1-PTTG1    | 7  | 6 |
| CDC16-CDC25A  | 6  | 2 |
| CDC16-LMNA    | 6  | 2 |
| CDC16-PLK1    | 6  | 3 |
| CDC16-WEE1    | 6  | 2 |
| CDC20-CDC25A  | 6  | 2 |

|               |   |   |
|---------------|---|---|
| CDC20-CDC27   | 6 | 2 |
| CDC23-CDC27   | 6 | 3 |
| CDC25A-CDC25C | 6 | 2 |
| CDC25A-MDM2   | 6 | 1 |
| CDC25B-MDM2   | 6 | 3 |
| CDC27-WEE1    | 6 | 3 |
| FZR1-MDM2     | 6 | 2 |
| LMNA-PPM1D    | 6 | 2 |
| ATM-CCNB1     | 5 | 3 |
| ATR-CCNB2     | 5 | 2 |
| ATR-MAD2L1    | 5 | 2 |
| ATR-PTTG1     | 5 | 4 |
| CDC16-CDC20   | 5 | 3 |
| CDC16-MAD2L2  | 5 | 2 |
| CDC23-MDM2    | 5 | 2 |
| CDC23-PPM1D   | 5 | 1 |
| CDC25A-CDKN1A | 5 | 2 |
| CDC25A-MAD2L2 | 5 | 2 |
| CDC25A-PLK1   | 5 | 2 |
| CDC25A-PPM1D  | 5 | 0 |
| CDC25A-WEE1   | 5 | 2 |
| CDC25B-MAD2L1 | 5 | 1 |
| CDC25C-FZR1   | 5 | 2 |
| CDC25C-MDM2   | 5 | 1 |
| CDKN1A-MDM2   | 5 | 1 |
| CDKN1A-PLK1   | 5 | 1 |
| FZR1-MAD2L2   | 5 | 4 |
| FZR1-PPP2CA   | 5 | 1 |
| LMNA-MDM2     | 5 | 1 |
| LMNA-PLK1     | 5 | 3 |
| MAD2L2-PPM1D  | 5 | 1 |
| PPM1D-PPP2CA  | 5 | 1 |
| CCNB1-CDC25A  | 4 | 2 |
| CCNB2-FZR1    | 4 | 2 |
| CDC16-CDC23   | 4 | 1 |
| CDC16-CDC27   | 4 | 1 |
| CDC16-PPM1D   | 4 | 0 |
| CDC16-PPP2CA  | 4 | 2 |
| CDC20-CDKN1A  | 4 | 2 |
| CDC20-LMNA    | 4 | 1 |
| CDC20-MAD2L2  | 4 | 2 |

|               |   |   |
|---------------|---|---|
| CDC20-PLK1    | 4 | 2 |
| CDC23-CDC25A  | 4 | 0 |
| CDC23-LMNA    | 4 | 0 |
| CDC23-PLK1    | 4 | 2 |
| CDC23-WEE1    | 4 | 2 |
| CDC25A-MAD2L1 | 4 | 2 |
| CDC25B-PPM1D  | 4 | 1 |
| CDC25C-CDC27  | 4 | 3 |
| CDC27-MDM2    | 4 | 2 |
| CDC27-PPP2CA  | 4 | 1 |
| CDKN1A-LMNA   | 4 | 1 |
| LMNA-PPP2CA   | 4 | 1 |
| MAD2L1-PLK1   | 4 | 2 |
| MAD2L2-WEE1   | 4 | 2 |
| CCNB1-CDC25B  | 3 | 2 |
| CCNB1-CDC25C  | 3 | 1 |
| CCNB1-LMNA    | 3 | 1 |
| CCNB1-MAD2L2  | 3 | 1 |
| CCNB2-CDC25A  | 3 | 0 |
| CCNB2-CDC25B  | 3 | 1 |
| CCNB2-PLK1    | 3 | 3 |
| CDC16-CDC25B  | 3 | 1 |
| CDC16-CDKN1A  | 3 | 2 |
| CDC16-MAD2L1  | 3 | 1 |
| CDC16-MDM2    | 3 | 0 |
| CDC16-PTTG1   | 3 | 2 |
| CDC20-CDC23   | 3 | 1 |
| CDC20-MAD2L1  | 3 | 1 |
| CDC20-PTTG1   | 3 | 2 |
| CDC23-CDC25B  | 3 | 1 |
| CDC23-CDKN1A  | 3 | 1 |
| CDC23-PPP2CA  | 3 | 0 |
| CDC25A-PPP2CA | 3 | 2 |
| CDC25B-CDC25C | 3 | 1 |
| CDC25B-CDKN1A | 3 | 1 |
| CDC25B-LMNA   | 3 | 1 |
| CDC25C-MAD2L2 | 3 | 0 |
| CDC27-LMNA    | 3 | 1 |
| CDC27-PPM1D   | 3 | 1 |
| CDC27-PTTG1   | 3 | 2 |
| CDKN1A-PPP2CA | 3 | 3 |

|               |   |   |
|---------------|---|---|
| CDKN1A-PTTG1  | 3 | 2 |
| FZR1-MAD2L1   | 3 | 1 |
| LMNA-MAD2L2   | 3 | 1 |
| LMNA-WEE1     | 3 | 1 |
| MAD2L1-PPM1D  | 3 | 1 |
| MAD2L2-PLK1   | 3 | 3 |
| MDM2-WEE1     | 3 | 1 |
| PPM1D-WEE1    | 3 | 0 |
| CCNB1-CDC20   | 2 | 1 |
| CCNB1-CDC27   | 2 | 2 |
| CCNB1-FZR1    | 2 | 2 |
| CCNB1-MAD2L1  | 2 | 1 |
| CCNB1-PPM1D   | 2 | 0 |
| CCNB2-CDC16   | 2 | 1 |
| CCNB2-CDC20   | 2 | 1 |
| CCNB2-CDC23   | 2 | 0 |
| CCNB2-MAD2L2  | 2 | 1 |
| CCNB2-PTTG1   | 2 | 2 |
| CDC16-CDC25C  | 2 | 0 |
| CDC20-CDC25C  | 2 | 1 |
| CDC20-MDM2    | 2 | 0 |
| CDC23-MAD2L2  | 2 | 1 |
| CDC23-PTTG1   | 2 | 2 |
| CDC25B-MAD2L2 | 2 | 1 |
| CDC25B-PTTG1  | 2 | 2 |
| CDC25C-PLK1   | 2 | 0 |
| CDC25C-WEE1   | 2 | 1 |
| CDC27-CDKN1A  | 2 | 1 |
| CDC27-MAD2L1  | 2 | 2 |
| CDC27-MAD2L2  | 2 | 2 |
| MAD2L1-MAD2L2 | 2 | 1 |
| MAD2L1-PPP2CA | 2 | 2 |
| PLK1-PPP2CA   | 2 | 0 |
| PLK1-WEE1     | 2 | 2 |
| PPM1D-PTTG1   | 2 | 1 |
| PTTG1-WEE1    | 2 | 2 |
| CCNB1-CCNB2   | 1 | 0 |
| CCNB1-CDC16   | 1 | 0 |
| CCNB1-CDKN1A  | 1 | 1 |
| CCNB1-PLK1    | 1 | 0 |
| CCNB1-PPP2CA  | 1 | 1 |



|               |   |   |
|---------------|---|---|
| CCNB1-WEE1    | 1 | 1 |
| CCNB2-CDC25C  | 1 | 0 |
| CCNB2-CDKN1A  | 1 | 1 |
| CCNB2-MAD2L1  | 1 | 0 |
| CCNB2-MDM2    | 1 | 0 |
| CCNB2-PPM1D   | 1 | 0 |
| CCNB2-PPP2CA  | 1 | 0 |
| CDC20-PPP2CA  | 1 | 1 |
| CDC23-CDC25C  | 1 | 0 |
| CDC23-MAD2L1  | 1 | 0 |
| CDC25C-MAD2L1 | 1 | 0 |
| CDC25C-PPP2CA | 1 | 0 |
| CDC25C-PTTG1  | 1 | 1 |
| CDKN1A-MAD2L1 | 1 | 0 |
| CDKN1A-MAD2L2 | 1 | 0 |
| CDKN1A-WEE1   | 1 | 0 |
| LMNA-MAD2L1   | 1 | 0 |
| LMNA-PTTG1    | 1 | 1 |
| MAD2L1-MDM2   | 1 | 0 |
| MAD2L1-WEE1   | 1 | 1 |
| MAD2L2-MDM2   | 1 | 0 |
| MDM2-PPP2CA   | 1 | 0 |
| MDM2-PTTG1    | 1 | 1 |
| PPP2CA-WEE1   | 1 | 0 |

**Supplementary Table 6.** The average logarithmic sensitivity intensities for p53-wt, p53-wt Plk1 depleted, p53-null cancer and Plk1-depleted p53-null cancer cells.

| p53-wt cancer cells |           | Plk1 depleted to 0.055 level in p53-wt cells |           | p53-null cells     |           | Plk1 depleted to 0.055 level in p53-null cells |           |
|---------------------|-----------|----------------------------------------------|-----------|--------------------|-----------|------------------------------------------------|-----------|
| Protein             | Intensity | Protein                                      | Intensity | Protein            | Intensity | Protein                                        | Intensity |
| Cdc20P              | 0.88      | p53P                                         | 4.29      | ATM/ATR            | 19.97     | Cdc20P                                         | 6.37      |
| APC/CP:Cdc20        | 0.87      | Wip1                                         | 3.29      | APC/CP:Cdc20       | 0.89      | Plk1P                                          | 5.38      |
| p53P:Plk1P          | 0.86      | p53                                          | 3.2       | Cdc20P             | 0.87      | APC/CP                                         | 5.11      |
| Plk1P               | 0.72      | p53P:Plk1P                                   | 3.14      | APC/CP             | 0.71      | Cdc25P                                         | 4.78      |
| APC/CP              | 0.71      | p53T                                         | 2.96      | Plk1P              | 0.7       | ATM/ATR                                        | 4.57      |
| Mad2:Cdc20P         | 0.7       | p21:MPF                                      | 2.9       | Mad2:Cdc20P        | 0.64      | APC/CP:Cdc20                                   | 4.28      |
| APC/CP:Cdh1         | 0.6       | ATM/ATR                                      | 2.73      | p21:MPF            | 0.58      | Mad2:Cdc20P                                    | 4.19      |
| Cdc25P              | 0.58      | Mdm2                                         | 2.71      | Cdc25P             | 0.56      | p21:MPF                                        | 3.84      |
| MPF (CyclinB:CDK1)  | 0.53      | APC/CP:Cdh1                                  | 2.68      | APC/CP:Cdh1        | 0.54      | MPF (CyclinB:CDK1)                             | 3.53      |
| p21:MPF             | 0.5       | APC/CP:Cdc20                                 | 1.52      | MPF (CyclinB:CDK1) | 0.53      | LMNAP                                          | 3.07      |
| Plk1                | 0.49      | preMPF                                       | 1.49      | Plk1               | 0.49      | Plk1T                                          | 2.43      |
| LMNAP               | 0.47      | APC/CP                                       | 1.21      | LMNAP              | 0.47      | preMPF                                         | 1.63      |
| Cdc20T              | 0.45      | CyclinBT                                     | 1.06      | Cdc20T             | 0.46      | Wee1P                                          | 1.63      |
| preMPF              | 0.44      | p21T                                         | 1         | preMPF             | 0.43      | Cdc25                                          | 1.59      |
| Pttg1P              | 0.44      | p21                                          | 0.95      | Plk1T              | 0.43      | APC/CP:Cdh1                                    | 1.42      |
| Pttg1T              | 0.43      | APC/CPT                                      | 0.83      | APC/C:Cdh1         | 0.43      | PP2AP                                          | 1.39      |
| Plk1T               | 0.42      | Cdc25                                        | 0.81      | Pttg1P             | 0.43      | Mdm2                                           | 1.37      |
| APC/C:Cdh1          | 0.42      | Cdc20T                                       | 0.78      | Pttg1T             | 0.42      | CyclinB                                        | 1.33      |
| Cdh1                | 0.39      | Mad2:Cdc20P                                  | 0.78      | Cdh1               | 0.39      | Cdc20T                                         | 1.26      |
| Cdc20               | 0.39      | Pttg1P                                       | 0.74      | Cdc20              | 0.39      | Wee1                                           | 0.96      |
| APC/CPT             | 0.37      | Cdc25T                                       | 0.71      | APC/CPT            | 0.36      | Wee1T                                          | 0.85      |
| Pttg1               | 0.32      | APC/CT:Cdh1                                  | 0.7       | Pttg1              | 0.33      | APC/C:Cdh1                                     | 0.82      |
| Wee1                | 0.32      | Pttg1T                                       | 0.67      | Wee1               | 0.33      | CyclinBT                                       | 0.78      |
| p53P                | 0.3       | Wee1P                                        | 0.67      | Cdc25              | 0.29      | Plk1                                           | 0.77      |
| Wee1P               | 0.29      | Plk1T                                        | 0.53      | Wee1T              | 0.28      | Cdh1                                           | 0.77      |
| Wee1T               | 0.28      | CyclinB                                      | 0.51      | Wee1P              | 0.28      | Pttg1                                          | 0.74      |
| Cdc25               | 0.27      | Cdc20P                                       | 0.5       | CyclinBT           | 0.27      | PP2A                                           | 0.68      |
| CyclinBT            | 0.27      | Plk1                                         | 0.49      | CyclinB            | 0.26      | APC/CT:Cdh1                                    | 0.64      |
| PP2AP               | 0.26      | Pttg1                                        | 0.48      | PP2AP              | 0.26      | Pttg1T                                         | 0.62      |
| CyclinB             | 0.26      | MPF (CyclinB:CDK1)                           | 0.46      | APC/CT:Cdh1        | 0.21      | Cdc20                                          | 0.61      |
| APC/CT:Cdh1         | 0.2       | Plk1P                                        | 0.45      | Cdc25T             | 0.2       | Pttg1P                                         | 0.61      |
| Cdc25T              | 0.19      | Cdc20                                        | 0.43      | PP2A               | 0.17      | Mad2T                                          | 0.56      |
| PP2A                | 0.17      | APC/C:Cdh1                                   | 0.43      | Mad2T              | 0.13      | Cdc25T                                         | 0.52      |
| Mad2T               | 0.13      | CDK1                                         | 0.42      | APC/C              | 0.12      | APC/CPT                                        | 0.43      |
| p21                 | 0.11      | LMNAP                                        | 0.35      | CDK1               | 0.11      | APC/C                                          | 0.34      |

|         |      |        |      |            |      |            |      |
|---------|------|--------|------|------------|------|------------|------|
| p21T    | 0.11 | Cdh1   | 0.34 | APC/CT     | 0.1  | CDK1       | 0.33 |
| APC/C   | 0.11 | PP2AP  | 0.31 | Mdm2       | 0.08 | Mad2       | 0.24 |
| CDK1    | 0.11 | Cdc25P | 0.3  | Mad2       | 0.06 | APC/CT     | 0.14 |
| APC/CT  | 0.1  | APC/CT | 0.23 | Cdh1T      | 0.05 | Cdh1T      | 0.12 |
| Mad2    | 0.06 | Wee1T  | 0.17 | Cdh1P      | 0.03 | Cdh1P      | 0.06 |
| Cdh1T   | 0.05 | Wee1   | 0.16 | p21        | 0.03 | p21        | 0.03 |
| Cdh1P   | 0.03 | PP2A   | 0.14 | p21T       | 0.03 | p21T       | 0.03 |
| p53T    | 0.03 | Mad2T  | 0.13 | PP2AT      | 0.01 | Wip1       | 0.01 |
| p53     | 0.03 | Mad2   | 0.1  | Wip1       | 0.01 | PP2AT      | 0.01 |
| Mdm2    | 0.01 | Cdh1T  | 0.08 | CDK1T      | 0    | CDK1T      | 0    |
| PP2AT   | 0.01 | APC/C  | 0.08 | LMNAT      | 0    | LMNAT      | 0    |
| ATM/ATR | 0.01 | Cdh1P  | 0.07 | p53        | NaN  | p53        | NaN  |
| Wip1    | 0.01 | PP2AT  | 0.01 | p53P       | NaN  | p53P       | NaN  |
| CDK1T   | 0    | CDK1T  | 0    | p53P:Plk1P | NaN  | p53P:Plk1P | NaN  |
| LMNAT   | 0    | LMNAT  | 0    | p53T       | NaN  | p53T       | NaN  |

**Supplementary Table 7.** Twenty proteins with largest average logarithmic sensitivity intensities for p53-wt cells, p53-wt Plk1 depleted cells, p53-null cancer and Plk1-depleted p53-null cancer cells.

| p53-wt cancer cells |           | Plk1 depleted to 0.055 level in p53-wt cancer cells |           | p53-null cells     |           | Plk1 depleted to 0.055 level in p53-null cells |           |
|---------------------|-----------|-----------------------------------------------------|-----------|--------------------|-----------|------------------------------------------------|-----------|
| Protein             | Intensity | Protein                                             | Intensity | Protein            | Intensity | Protein                                        | Intensity |
| Cdc20P              | 0.88      | p53P                                                | 4.29      | ATM/ATR            | 19.97     | Cdc20P                                         | 6.37      |
| APC/CP:Cdc20        | 0.87      | Wip1                                                | 3.29      | APC/CP:Cdc20       | 0.89      | Plk1P                                          | 5.38      |
| p53P:Plk1P          | 0.86      | p53                                                 | 3.2       | Cdc20P             | 0.87      | APC/CP                                         | 5.11      |
| Plk1P               | 0.72      | p53P:Plk1P                                          | 3.14      | APC/CP             | 0.71      | Cdc25P                                         | 4.78      |
| APC/CP              | 0.71      | p53T                                                | 2.96      | Plk1P              | 0.7       | ATM/ATR                                        | 4.57      |
| Mad2:Cdc20P         | 0.7       | p21:MPF                                             | 2.9       | Mad2:Cdc20P        | 0.64      | APC/CP:Cdc20                                   | 4.28      |
| APC/CP:Cdh1         | 0.6       | ATM/ATR                                             | 2.73      | p21:MPF            | 0.58      | Mad2:Cdc20P                                    | 4.19      |
| Cdc25P              | 0.58      | Mdm2                                                | 2.71      | Cdc25P             | 0.56      | p21:MPF                                        | 3.84      |
| MPF (CyclinB:CDK1)  | 0.53      | APC/CP:Cdh1                                         | 2.68      | APC/CP:Cdh1        | 0.54      | MPF (CyclinB:CDK1)                             | 3.53      |
| p21:MPF             | 0.5       | APC/CP:Cdc20                                        | 1.52      | MPF (CyclinB:CDK1) | 0.53      | LMNAP                                          | 3.07      |
| Plk1                | 0.49      | preMPF                                              | 1.49      | Plk1               | 0.49      | Plk1T                                          | 2.43      |
| LMNAP               | 0.47      | APC/CP                                              | 1.21      | LMNAP              | 0.47      | preMPF                                         | 1.63      |
| Cdc20T              | 0.45      | CyclinBT                                            | 1.06      | Cdc20T             | 0.46      | Wee1P                                          | 1.63      |
| preMPF              | 0.44      | p21T                                                | 1         | preMPF             | 0.43      | Cdc25                                          | 1.59      |
| Pttg1P              | 0.44      | p21                                                 | 0.95      | Plk1T              | 0.43      | APC/CP:Cdh1                                    | 1.42      |
| Pttg1T              | 0.43      | APC/CPT                                             | 0.83      | APC/C:Cdh1         | 0.43      | PP2AP                                          | 1.39      |
| Plk1T               | 0.42      | Cdc25                                               | 0.81      | Pttg1P             | 0.43      | Mdm2                                           | 1.37      |
| APC/C:Cdh1          | 0.42      | Cdc20T                                              | 0.78      | Pttg1T             | 0.42      | CyclinB                                        | 1.33      |
| Cdh1                | 0.39      | Mad2:Cdc20P                                         | 0.78      | Cdh1               | 0.39      | Cdc20T                                         | 1.26      |
| Cdc20               | 0.39      | Pttg1P                                              | 0.74      | Cdc20              | 0.39      | Wee1                                           | 0.96      |

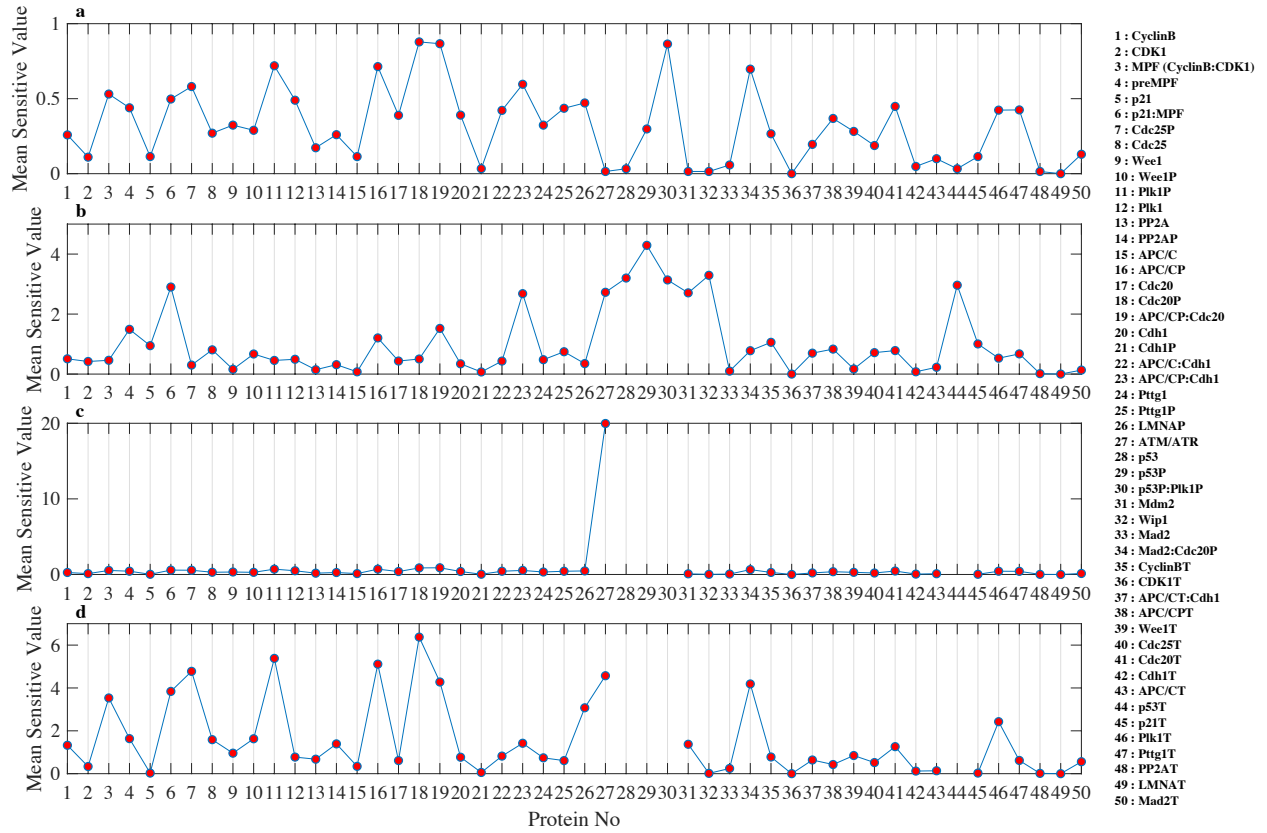

**Supplementary Figure 3.** The average logarithmic sensitivity intensities for 50 model components for WT (a), Plk1 depleted WT (b), p53-null cancer (c) and Plk1-depleted p53-null cancer (d) cells.

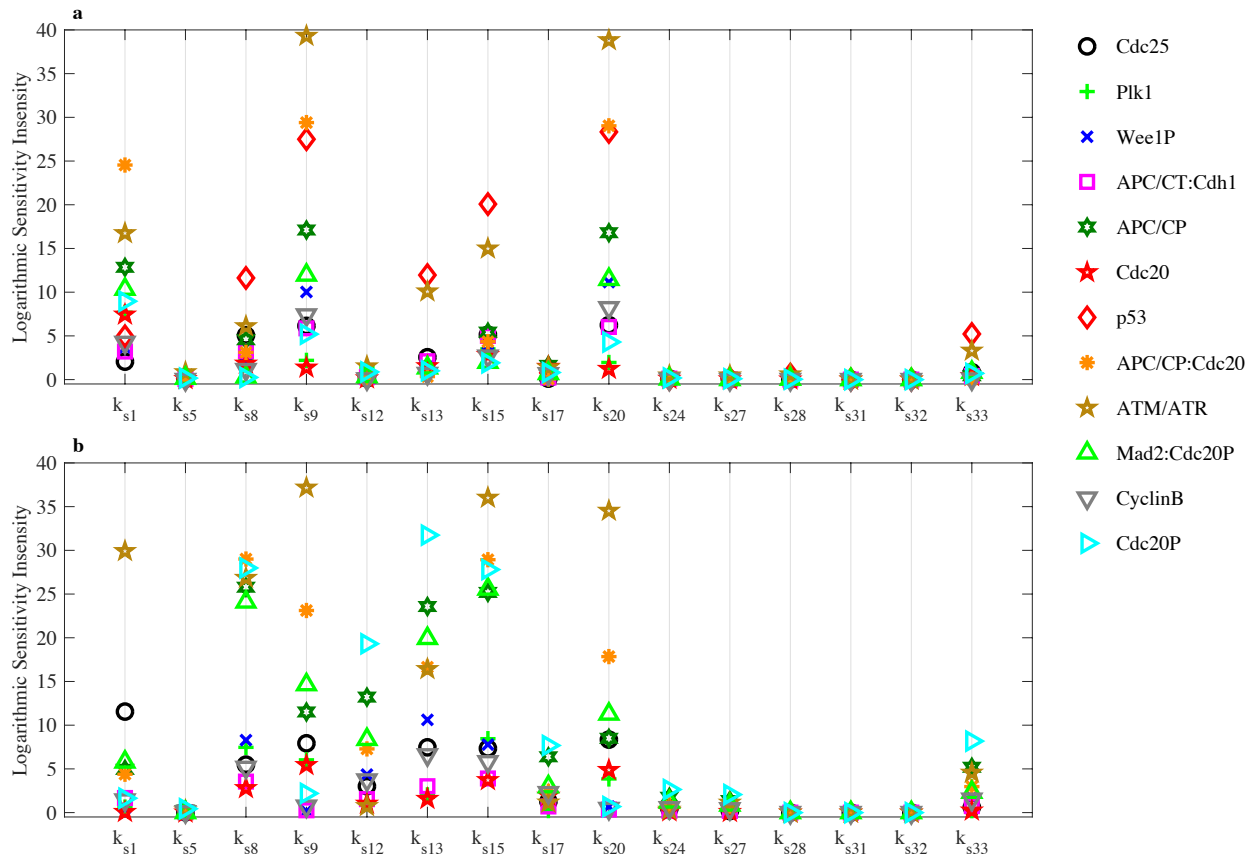

**Supplementary Figure 4. Logarithmic intensities for Mad2, Wee1, Cdc20, Cdc25P, PP2AP, Plk1T, ATM/ATR, p53, Mdm2, Wip1, p21, Mad2:Cdc20P, Cdh1, MPF regulators in WT (a) and p53-null cancer (b) cells. The sensitivity intensities are obtained by varying  $k_{s1}$ ,  $k_{s5}$ ,  $k_{s8}$ ,  $k_{s9}$ ,  $k_{s12}$ ,  $k_{s13}$ ,  $k_{s15}$ ,  $k_{s17}$ ,  $k_{s20}$ ,  $k_{s24}$ ,  $k_{s27}$ ,  $k_{s28}$ ,  $k_{s31}$ ,  $k_{s32}$ ,  $k_{s33}$  parameters that control synthesis rates of Cyclin B, p21, cdc25, Wee1, Plk1, PP2A, APC/C, Cdc20, Cdh1, Pttg1, ATM/ATR, p53, Mdm2, Wip1, Mad2 correspondingly.**







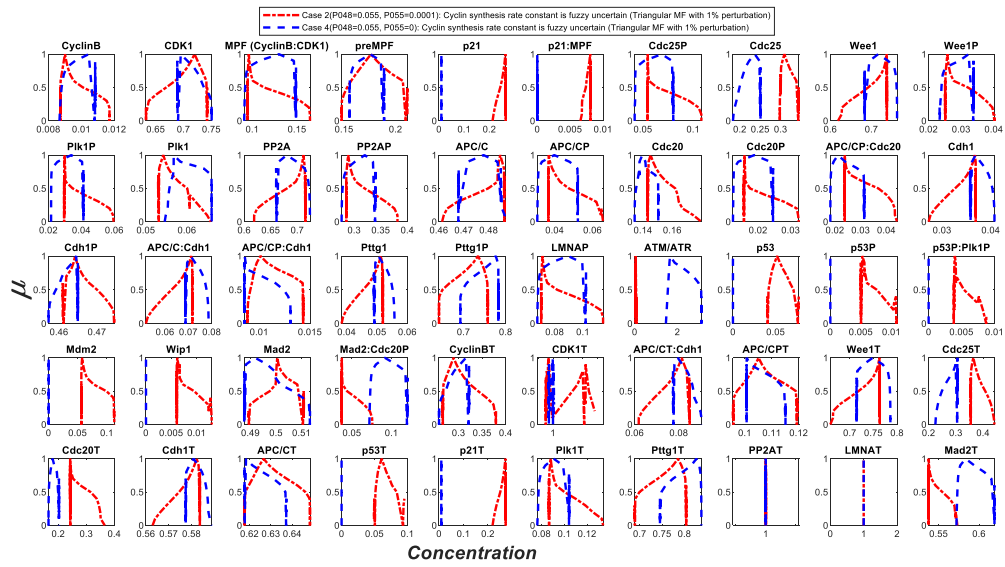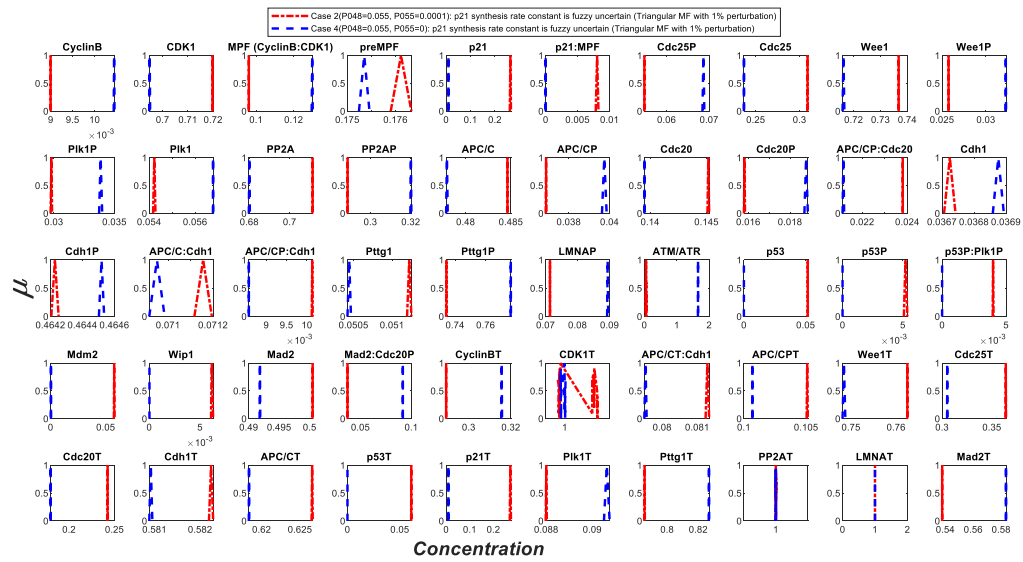

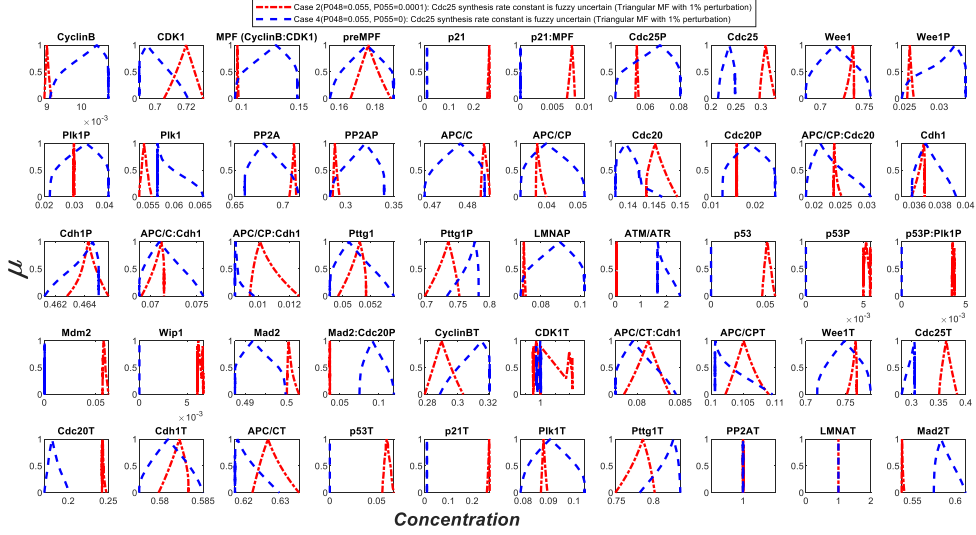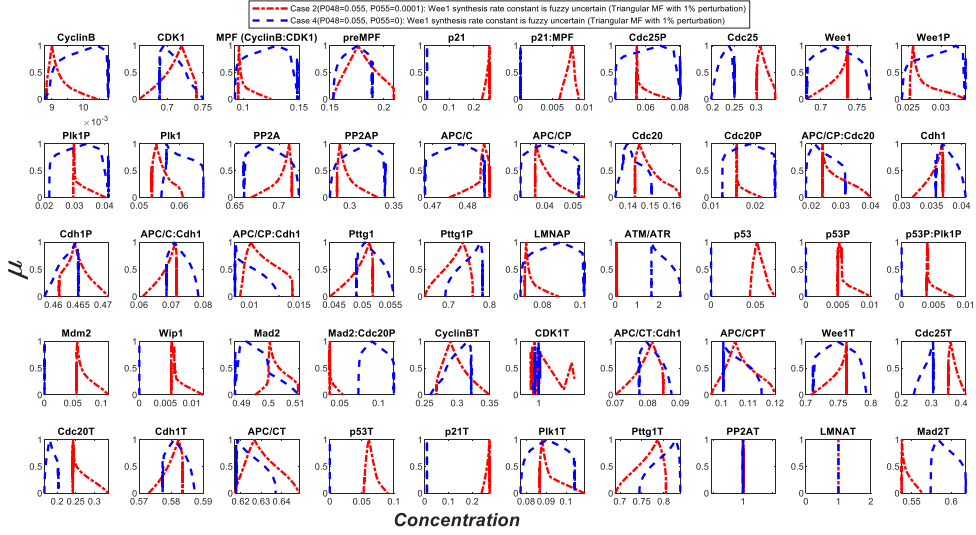

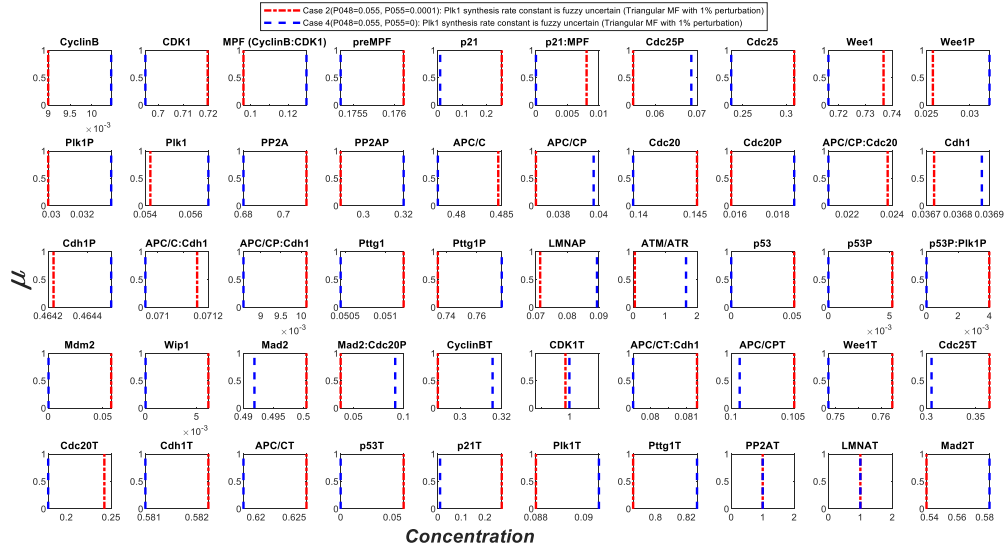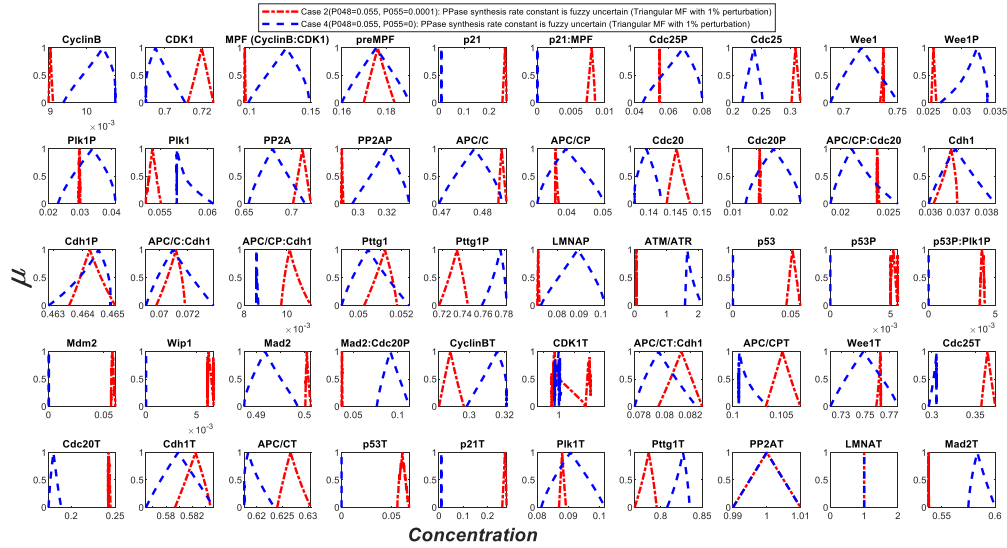

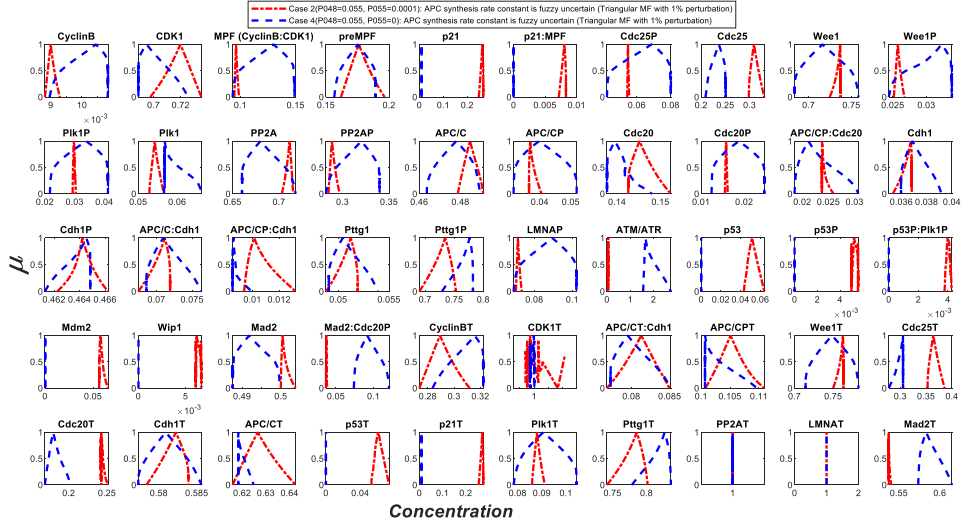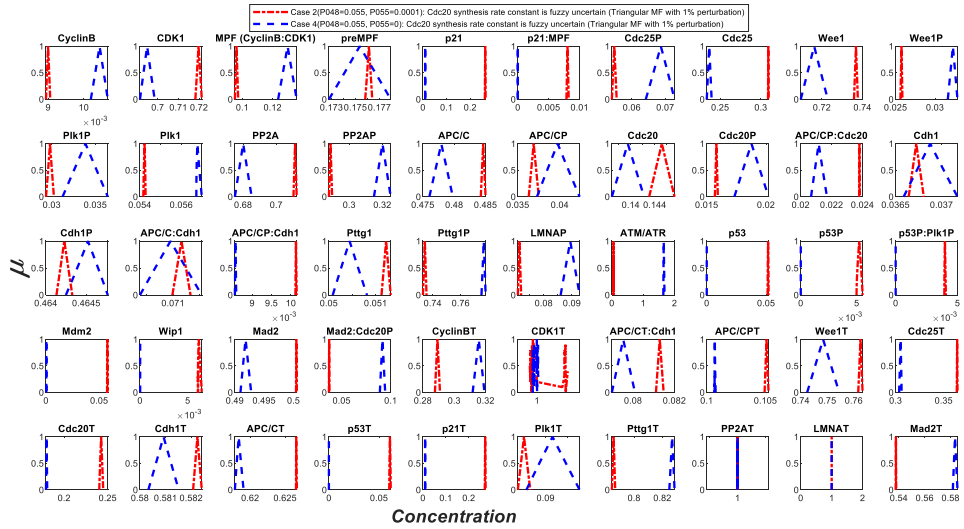

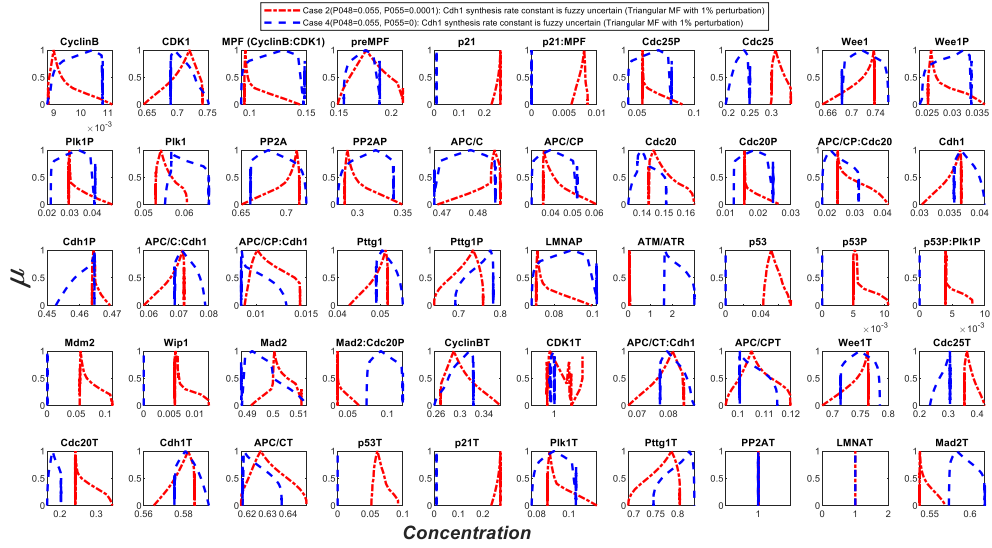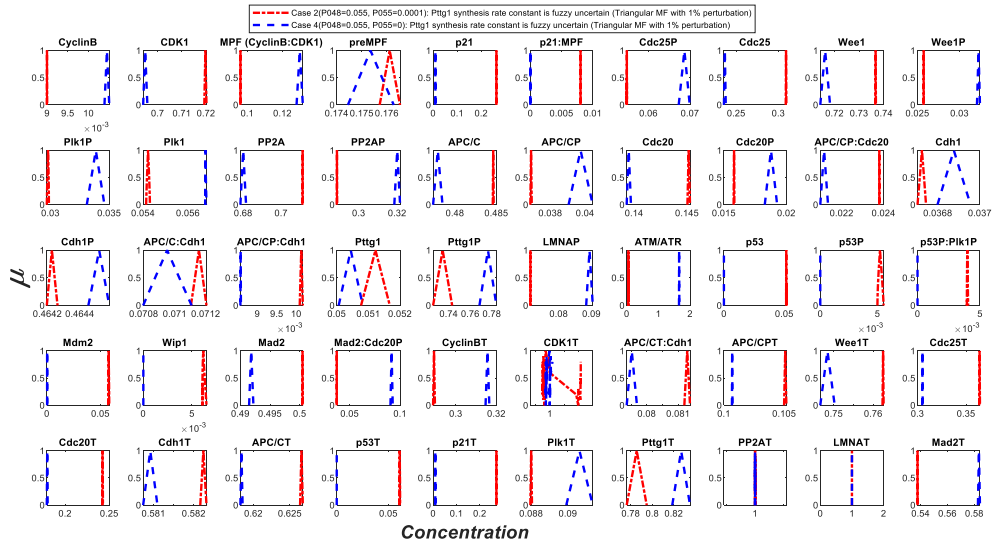

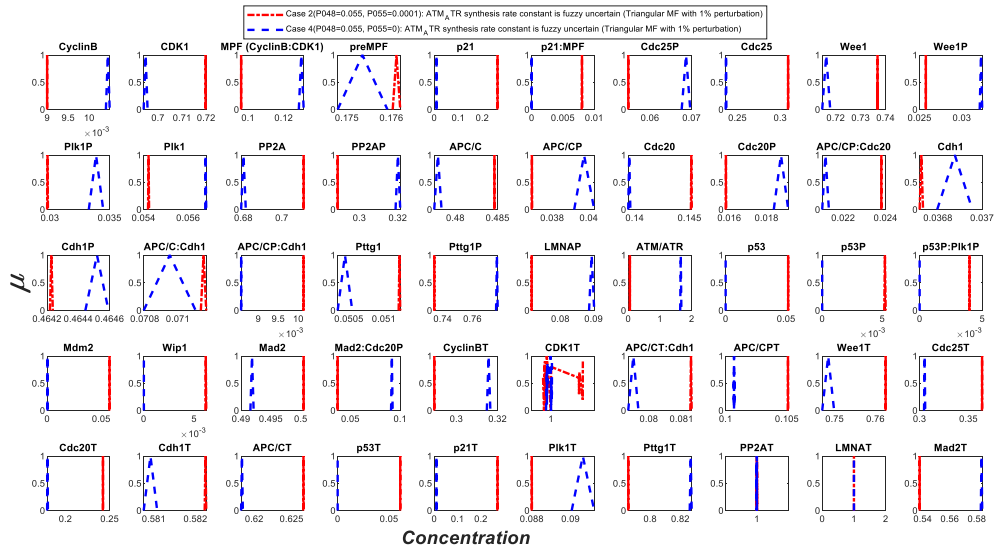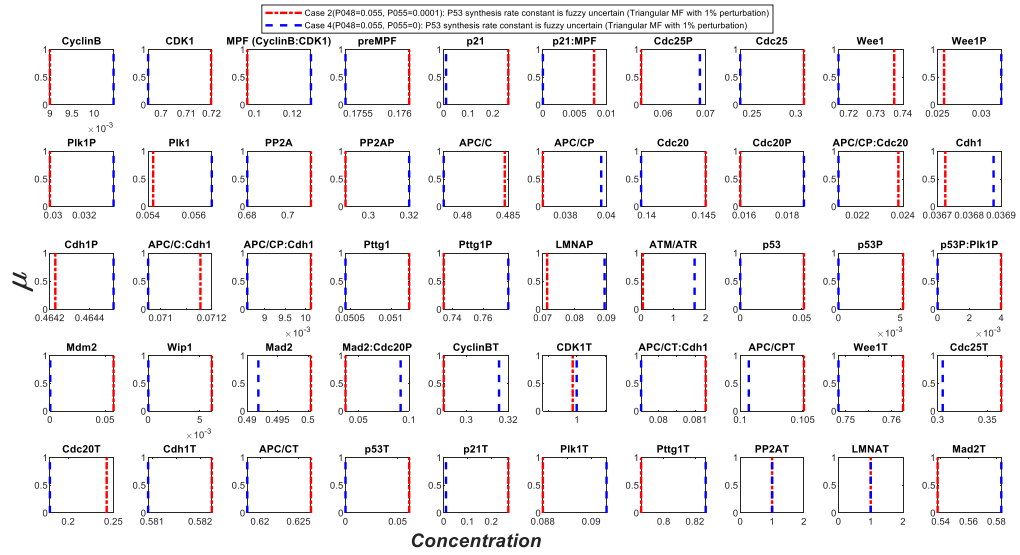

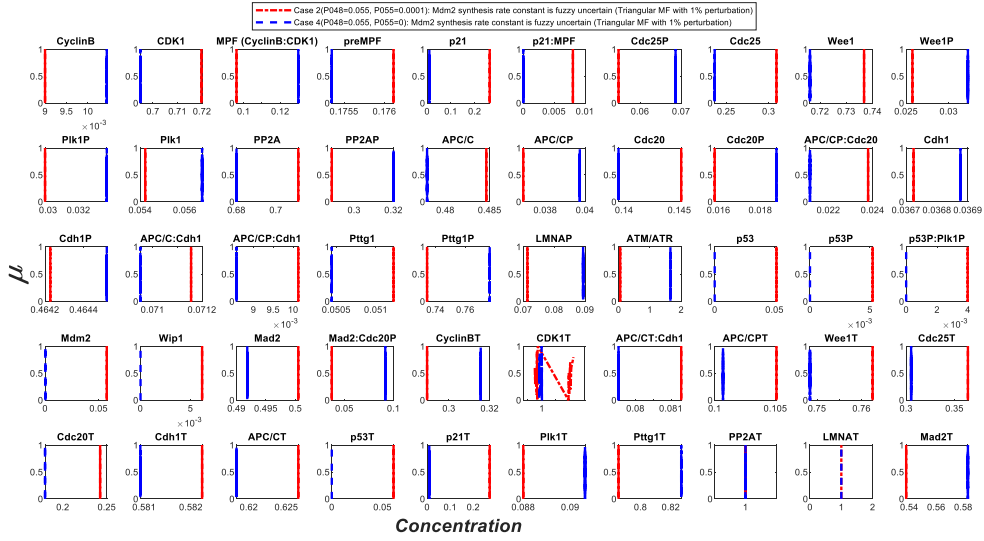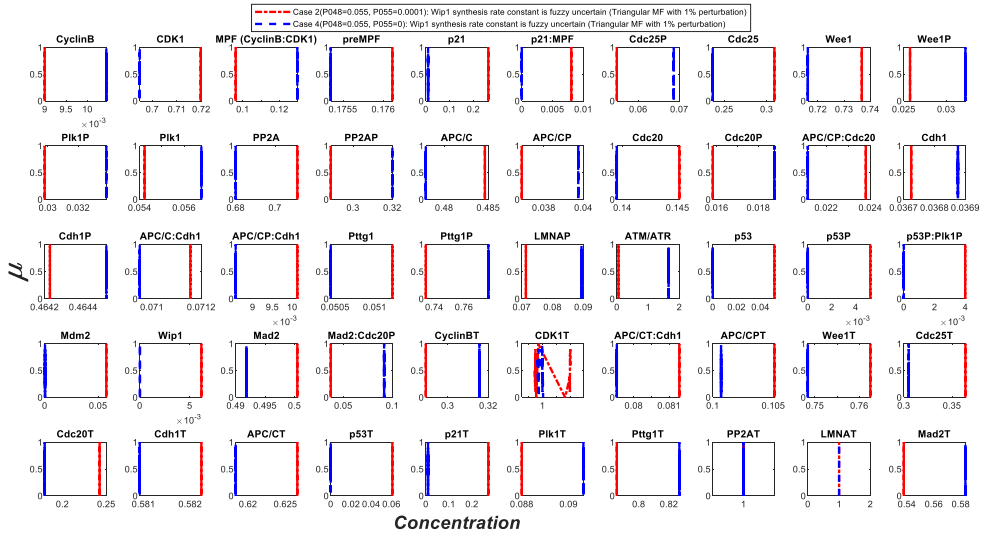

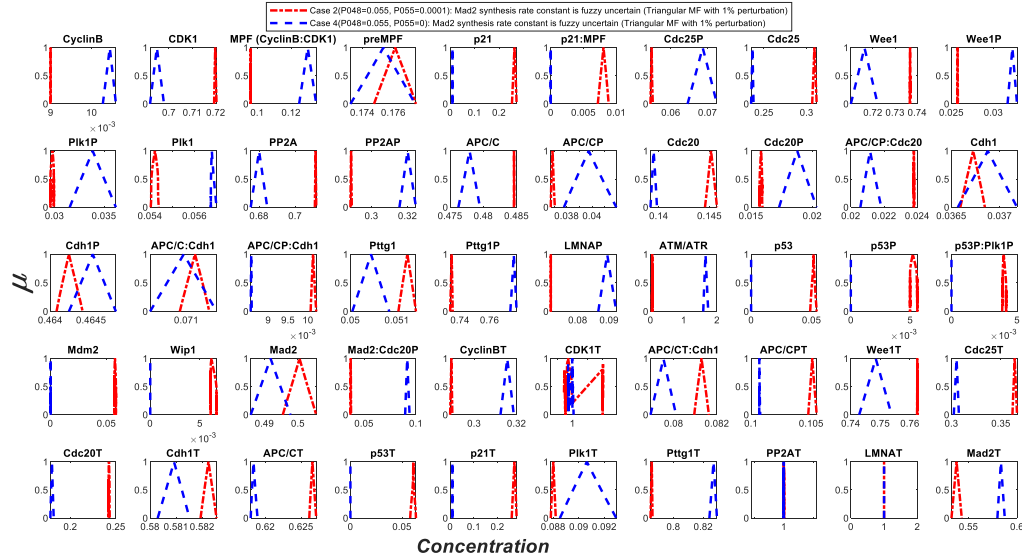

**Figure 6.** Fuzzy analysis for comparison of case 2 (red dot-dashed lines) (p53-wt Plk1 depleted by 45%) and case 4 (blue dashed lines) (p53-null Plk1 depleted by 45%). The analysis is performed for 50 model components (shown as titles for panels) by setting  $k_{s1}$ ,  $k_{s5}$ ,  $k_{s8}$ ,  $k_{s9}$ ,  $k_{s12}$ ,  $k_{s13}$ ,  $k_{s15}$ ,  $k_{s17}$ ,  $k_{s20}$ ,  $k_{s24}$ ,  $k_{s27}$ ,  $k_{s28}$ ,  $k_{s31}$ ,  $k_{s32}$ ,  $k_{s33}$  as fuzzy parameters. These parameters control the synthesis of Cyclin B, p21, Cdc25, Wee1, Plk1, PP2A, APC/C, Cdc20, Cdh1, Pttg1, ATM/ATR, p53, Mdm2, Wip1, Mad2 proteins, respectively. Each parameter is perturbed by 1% of its value. The horizontal axis of each panel depicts the maximum uncertainty band of concentration of model components affected by uncertainty of the parameter. The vertical axis shows the different  $\alpha$ -cut levels (by increasing the  $\alpha$  value from zero, the uncertainty decreases and  $\alpha = 1$ , depicts the crisp setting (no uncertainty)).



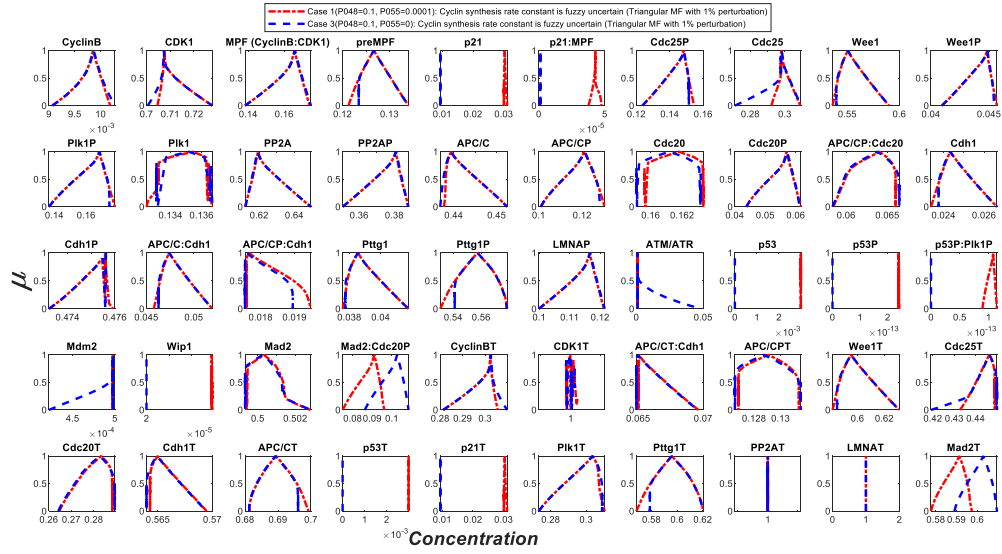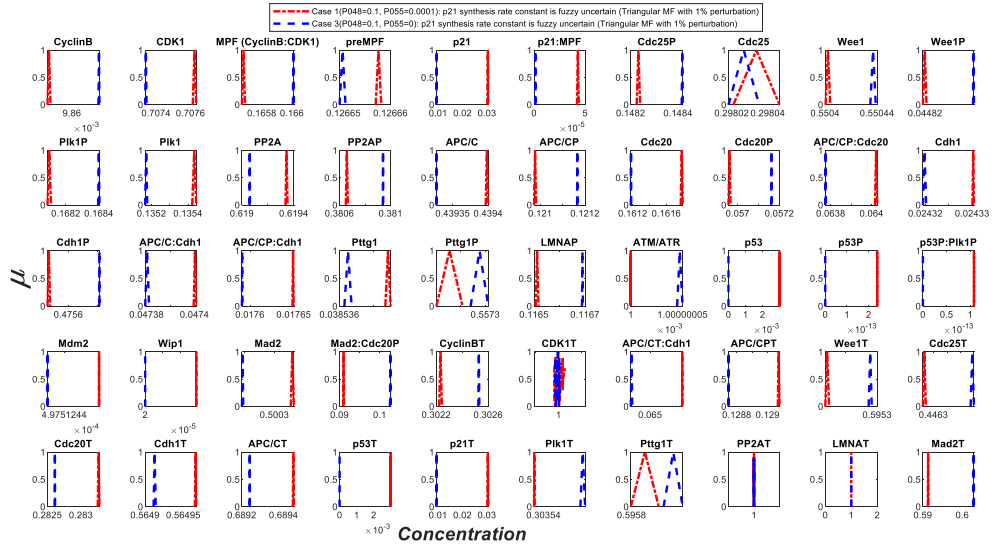

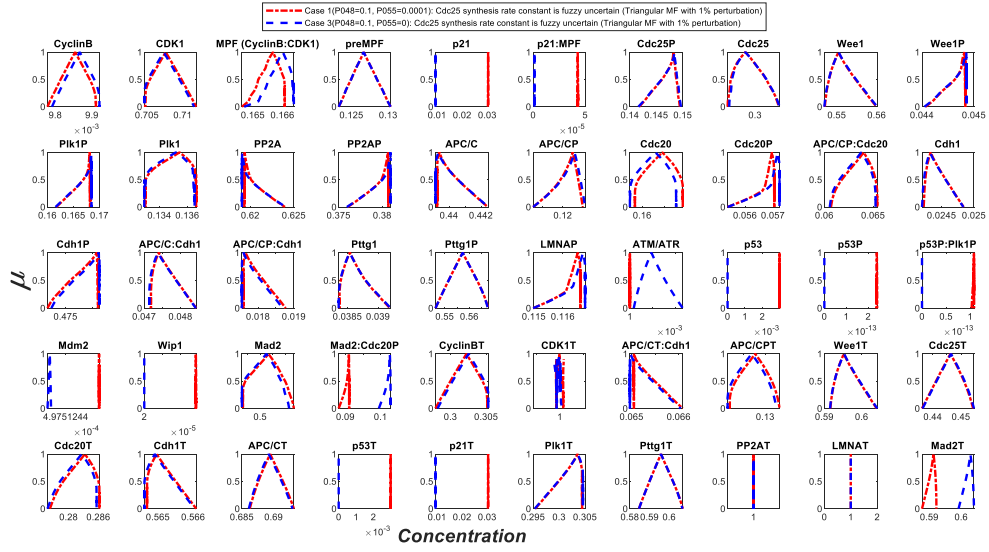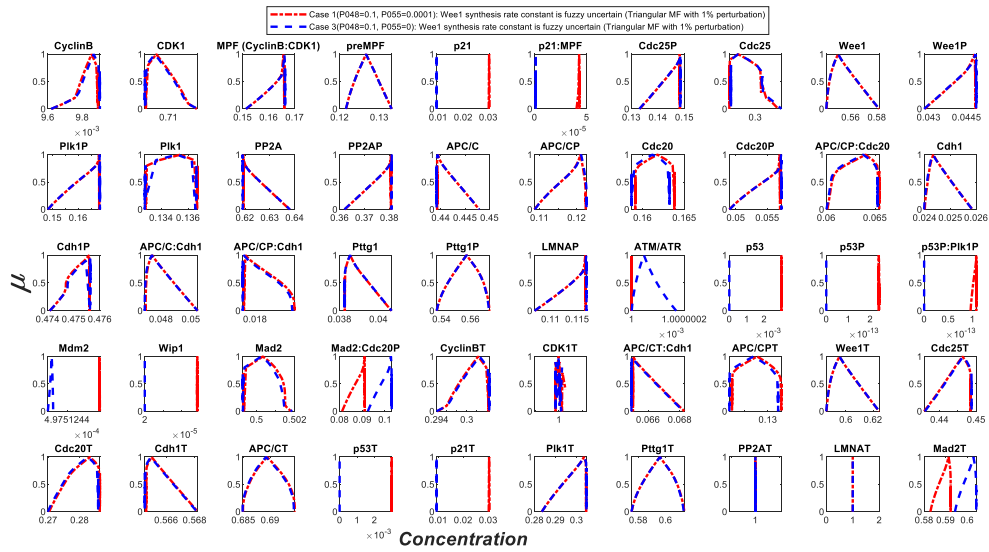

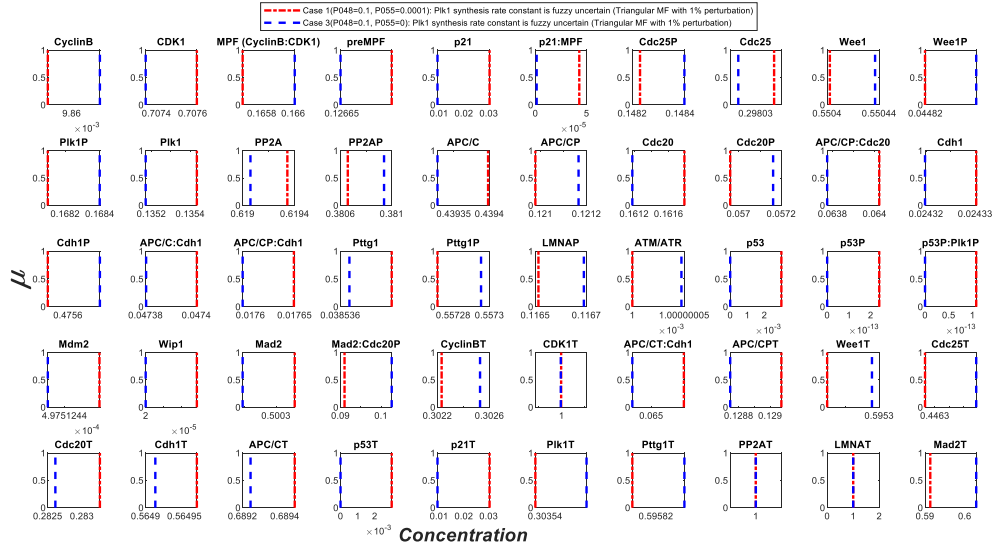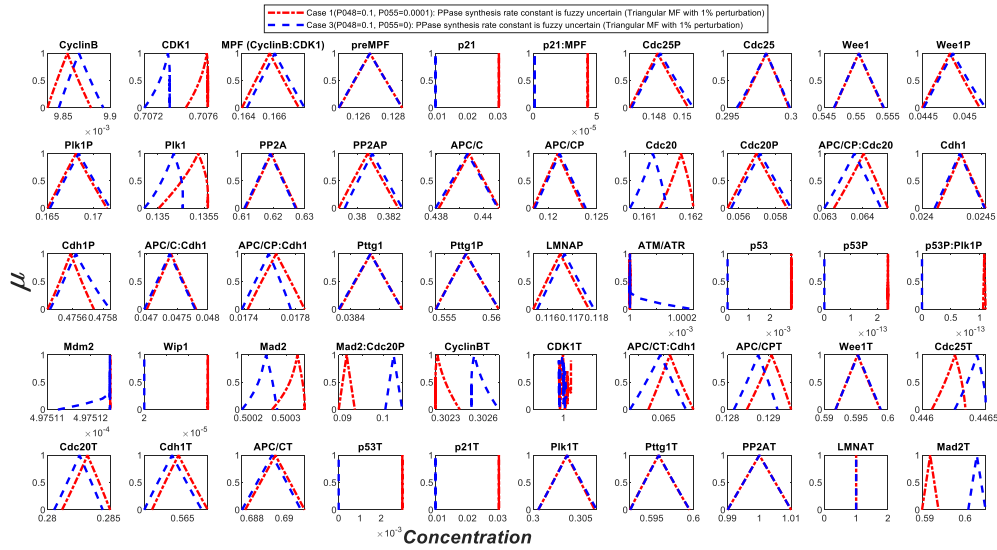

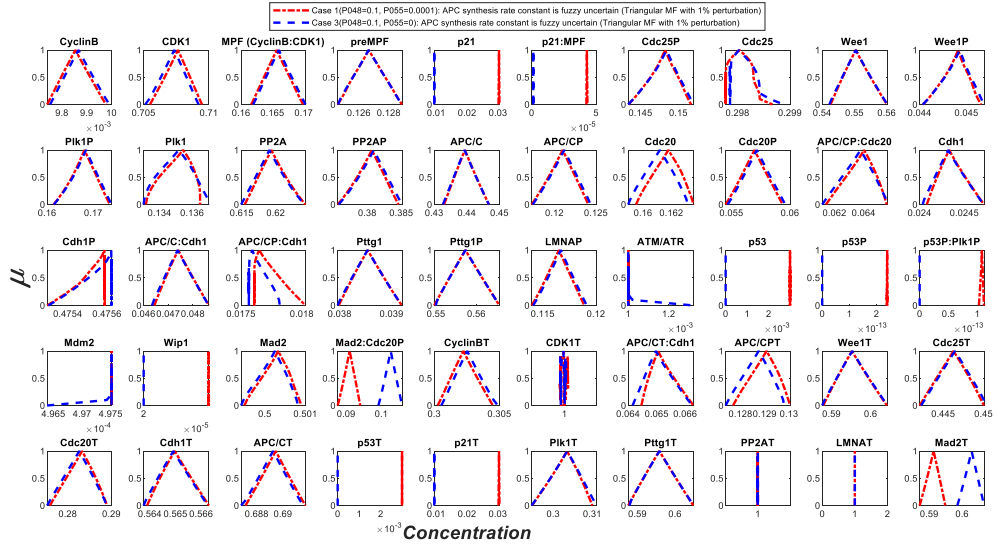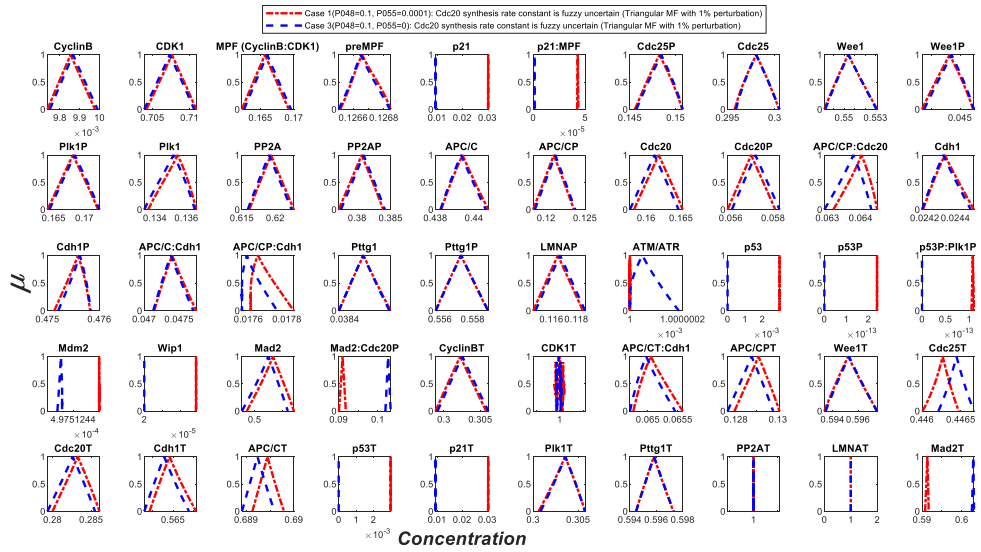

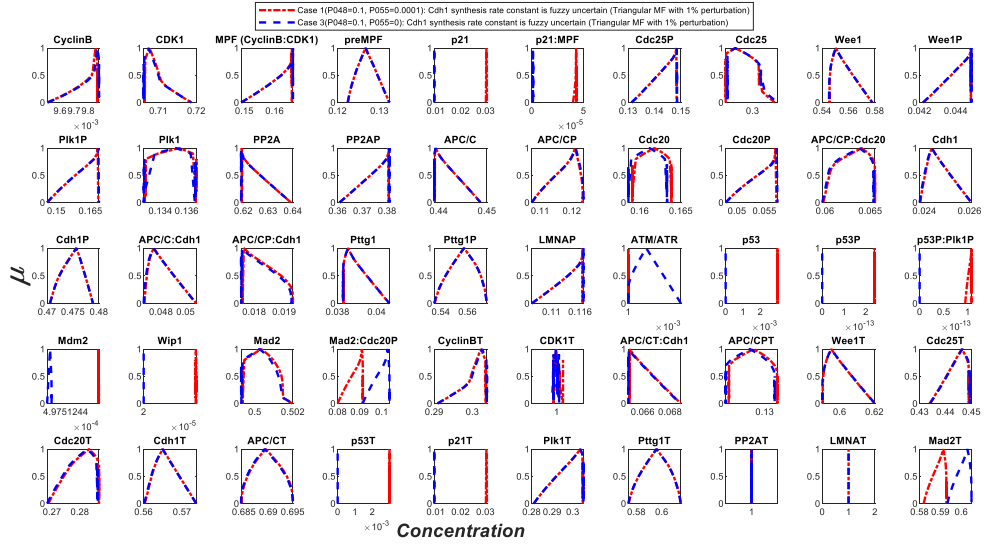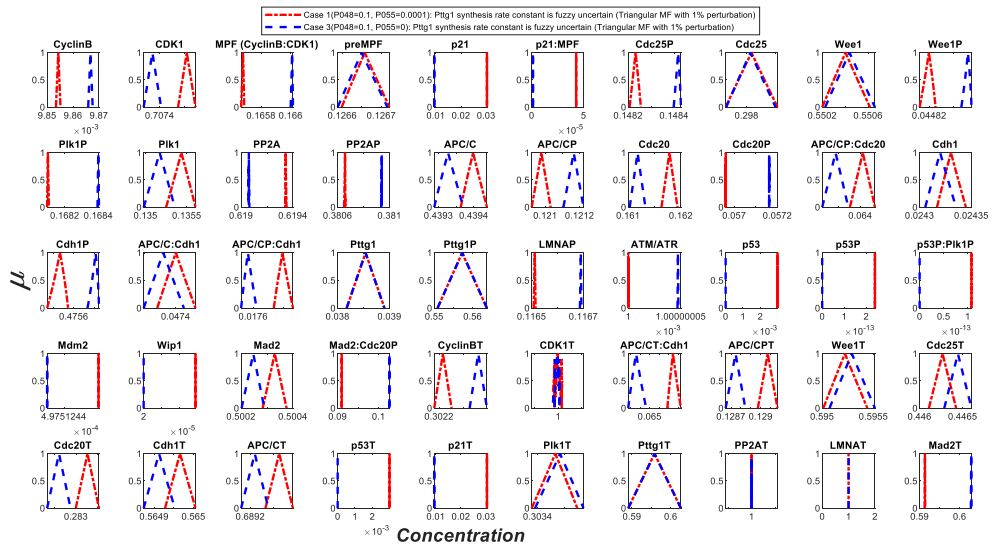

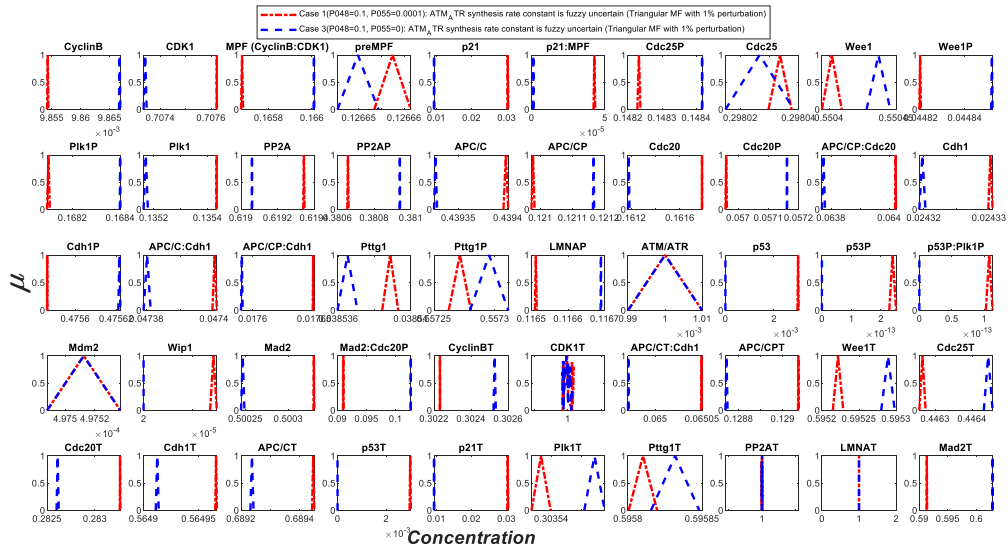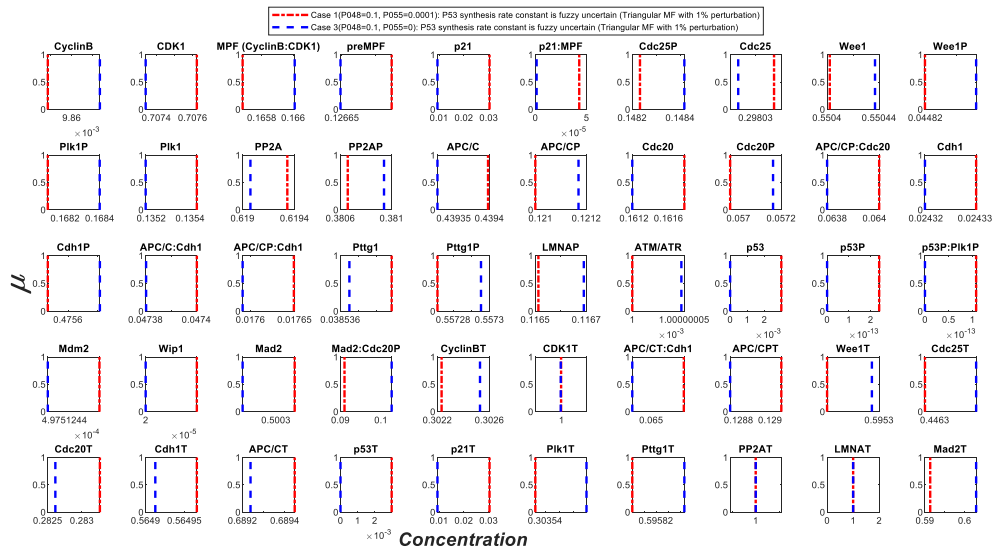

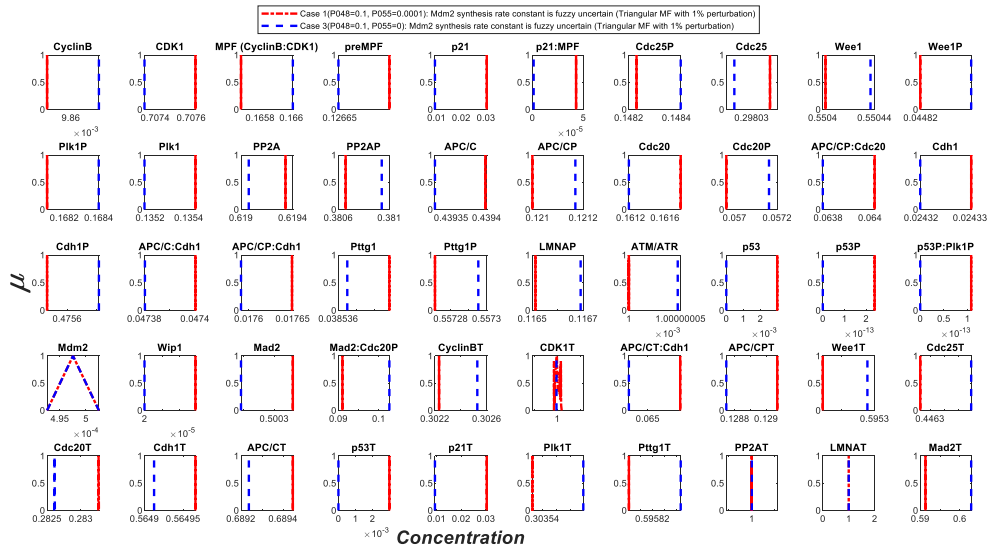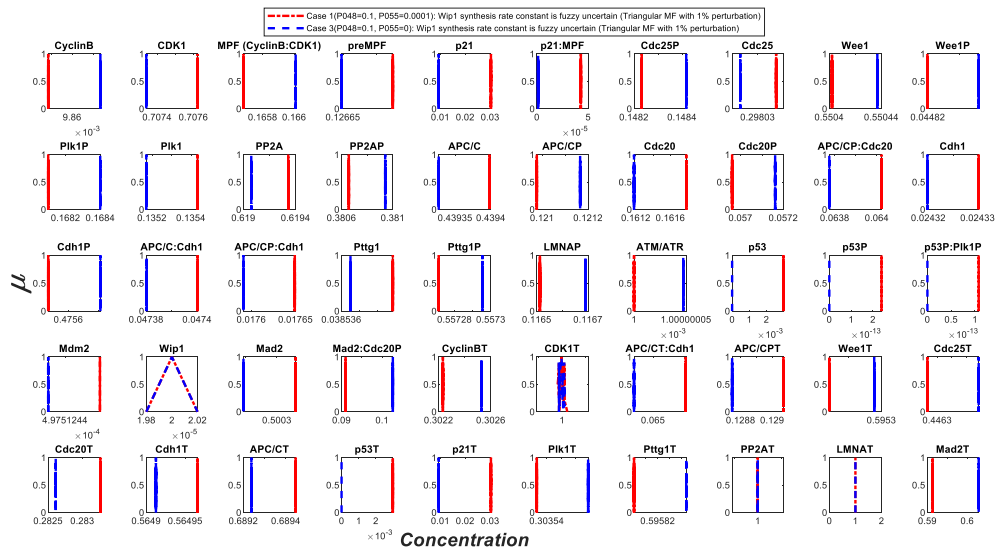

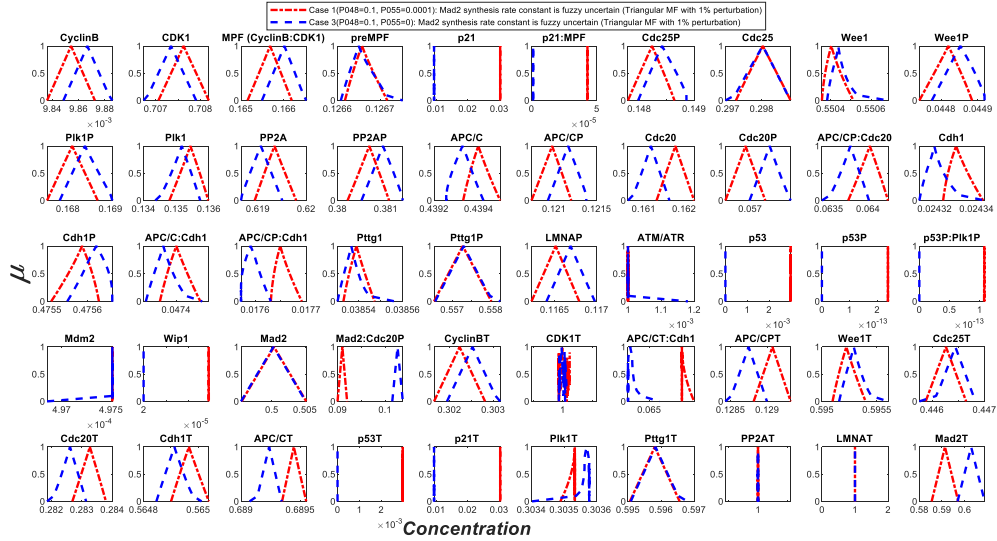

**Supplementary Figure 7.** Fuzzy analysis for comparison of case 1 (red dot-dashed lines) (p53-wt Plk1-normal) and case 3 (blue dashed lines) (p53-null Plk1-normal). The analysis is performed for 50 model components (shown as titles for panels) by setting  $k_{s1}$ ,  $k_{s5}$ ,  $k_{s8}$ ,  $k_{s9}$ ,  $k_{s12}$ ,  $k_{s13}$ ,  $k_{s15}$ ,  $k_{s17}$ ,  $k_{s20}$ ,  $k_{s24}$ ,  $k_{s27}$ ,  $k_{s28}$ ,  $k_{s31}$ ,  $k_{s32}$ ,  $k_{s33}$  as fuzzy parameters. These parameters control the synthesis of Cyclin B, p21, Cdc25, Wee1, Plk1, PP2A, APC/C, Cdc20, Cdh1, Pttg1, ATM/ATR, p53, Mdm2, Wip1, Mad2 proteins, respectively. Each parameter is perturbed by 1% of its value. The horizontal axis of each panel depicts the maximum uncertainty band of concentration of model components affected by uncertainty of the parameter. The vertical axis shows the different  $\alpha$ -cut levels (by increasing the  $\alpha$  value from zero, the uncertainty decreases and  $\alpha = 1$ , depicts the crisp setting (no uncertainty)).



**Supplementary Table 8.** Predicted phenotypes of p53-wt and p-53 cancer cells that carry a mutation in the interaction described by the corresponding parameter that is set to 0. “inviable” indicates cell cycle arrest and the number is the ratio of  $T_m/T$ , where  $T_m$  is the mutant cell cycle period and  $T$  is the cell cycle period in wild type.

| No | Perturbation             | Mutation Description                            | p53-wt   | p53-null | p53-wt<br>(Plk1<br>=0.055) | p53-null<br>(Plk1<br>=0.055) |
|----|--------------------------|-------------------------------------------------|----------|----------|----------------------------|------------------------------|
| 1  | $k_{f1} \rightarrow 0$   | Loss of association of CycB and CDK1            | inviable | inviable | inviable                   | inviable                     |
| 2  | $k_{r1} \rightarrow 0$   | Loss of dissociation of MPF                     | 1.095    | 1.295    | 1.382                      | inviable                     |
| 3  | $k'_{f2} \rightarrow 0$  | Loss of dephosphorylation in preMPF by Cdc25P   | inviable | inviable | inviable                   | inviable                     |
| 4  | $k''_{f2} \rightarrow 0$ | Loss of dephosphorylation in preMPF by Cdc25    | inviable | inviable | inviable                   | inviable                     |
| 5  | $k'_{r2} \rightarrow 0$  | Loss of phosphorylation sites of MPF by Wee1    | inviable | inviable | inviable                   | inviable                     |
| 6  | $k''_{r2} \rightarrow 0$ | Loss of phosphorylation sites of MPF by Wee1P   | 1.006    | 1.006    | 1.368                      | 1.839                        |
| 7  | $k'_{f3} \rightarrow 0$  | Loss of phosphorylation sites of Cdc25 by MPF   | 1.335    | 1.455    | inviable                   | inviable                     |
| 8  | $k''_{f3} \rightarrow 0$ | Loss of phosphorylation sites of Cdc25 by Plk1P | 1.041    | 1.043    | 1.465                      | 1.932                        |
| 9  | $k'_{r3} \rightarrow 0$  | Loss of dephosphorylation of Cdc25P by PP2A     | 0.337    | 0.335    | 0.376                      | 0.372                        |
| 10 | $k'_{f4} \rightarrow 0$  | Loss of phosphorylation sites of Wee1 by MPF    | inviable | inviable | inviable                   | inviable                     |
| 11 | $k''_{f4} \rightarrow 0$ | Loss of phosphorylation sites of Wee1 by Plk1P  | 1.002    | 1.002    | 1.521                      | 1.831                        |
| 12 | $k'_{r4} \rightarrow 0$  | Loss of dephosphorylation of Wee1 by PP2A       | 0.684    | 0.682    | 0.756                      | 1.06                         |
| 13 | $k_{f5} \rightarrow 0$   | Loss of dissociation of p21:MPF                 | 1.002    | 1        | 1.55                       | 1.845                        |
| 14 | $k_{r5} \rightarrow 0$   | Loss of association of p21 and MPF              | 0.998    | 1        | 1.351                      | 1.837                        |
| 15 | $k'_{f6} \rightarrow 0$  | Loss of phosphorylation sites of Plk1 by MPF    | inviable | inviable | inviable                   | inviable                     |
| 16 | $k'_{r6} \rightarrow 0$  | Loss of dephosphorylation of Plk1P by PP2A      | inviable | inviable | inviable                   | inviable                     |
| 17 | $k_{f7} \rightarrow 0$   | Loss of dephosphorylation of PP2AP              | inviable | inviable | inviable                   | inviable                     |
| 18 | $k'_{r7} \rightarrow 0$  | Loss of phosphorylation sites of PP2A by MPF    | 0.69     | 0.688    | inviable                   | inviable                     |
| 19 | $k'_{f8} \rightarrow 0$  | Loss of phosphorylation sites of APC/C by MPF   | 1.056    | 1.262    | 1.184                      | inviable                     |
| 20 | $k''_{f8} \rightarrow 0$ | Loss of phosphorylation sites of APC/C by Plk1P | inviable | 1.556    | 1.021                      | inviable                     |
| 21 | $k'_{r8} \rightarrow 0$  | Loss of dephosphorylation of APC/CP by PP2A     | inviable | inviable | inviable                   | inviable                     |
| 22 | $k'_{r9} \rightarrow 0$  | Loss of phosphorylation sites of Cdc20 by MPF   | 0.758    | 0.76     | 1.035                      | 1.037                        |
| 23 | $k''_{r9} \rightarrow 0$ | Loss of phosphorylation sites of Cdc20 by Plk1P | 0.752    | 0.752    | 1.184                      | 1.188                        |
| 24 | $k'_{f9} \rightarrow 0$  | Loss of dephosphorylation of Cdc20 by PP2A      | inviable | inviable | 1.822                      | inviable                     |
| 25 | $k_{f10} \rightarrow 0$  | Loss of association of APC/CP and Cdc20         | inviable | inviable | inviable                   | inviable                     |
| 26 | $k_{r10} \rightarrow 0$  | Loss of dissociation of APC/CP:Cdc20            | inviable | inviable | inviable                   | inviable                     |

|    |                           |                                                         |          |          |          |          |
|----|---------------------------|---------------------------------------------------------|----------|----------|----------|----------|
| 27 | $k'_{f11} \rightarrow 0$  | Loss of dephosphorylation of Cdh1P by PP2A              | 0.769    | 0.771    | 0.853    | 1.182    |
| 28 | $k'_{r11} \rightarrow 0$  | Loss of phosphorylation sites of Cdh1 by MPF            | inviable | inviable | inviable | inviable |
| 29 | $k''_{r11} \rightarrow 0$ | Loss of phosphorylation sites of Cdh1 by Plk1P          | 2.32     | 2.32     | inviable | inviable |
| 30 | $k_{f12} \rightarrow 0$   | Loss of association of APC/C and Cdh1                   | 0.424    | 0.421    | 0.467    | 0.463    |
| 31 | $k_{r12} \rightarrow 0$   | Loss of dissociation of APC/C:Cdh1                      | inviable | inviable | inviable | inviable |
| 32 | $k_{f13} \rightarrow 0$   | Loss of association of APC/CP and Cdh1                  | 0.86     | 0.944    | 1.048    | 1.61     |
| 33 | $k_{r13} \rightarrow 0$   | Loss of dissociation of APC/CP:Cdh1                     | 1.64     | 1.643    | inviable | inviable |
| 34 | $k'_{f14} \rightarrow 0$  | Loss of dephosphorylation of Pttg1P by PP2A             | 1.002    | 1.004    | 1.393    | 1.851    |
| 35 | $k'_{r14} \rightarrow 0$  | Loss of phosphorylation sites of Pttg1 by MPF           | 0.862    | 0.862    | 0.977    | 1.314    |
| 36 | $k'_{f15} \rightarrow 0$  | Loss of phosphorylation sites of LMNA by MPF            | 1        | 1        | 1.382    | 1.837    |
| 37 | $k_{r15} \rightarrow 0$   | Loss of dephosphorylation of LMNAP                      | 1        | 1        | 1.382    | 1.837    |
| 38 | $k'_{f16} \rightarrow 0$  | Loss of phosphorylation rate constant of p53 by ATM:ATR | 1        | 1        | inviable | 1.837    |
| 39 | $k'_{r16} \rightarrow 0$  | Loss of dephosphorylation rate constant of p53P by Wip1 | 1        | 1        | 1.345    | 1.837    |
| 40 | $k_{f17} \rightarrow 0$   | Loss of association of p53P and Plk1P                   | 1        | 1        | 1.407    | 1.837    |
| 41 | $k_{r17} \rightarrow 0$   | Loss of association of p53P: Plk1P                      | 1        | 1        | 1.343    | 1.837    |
| 42 | $k_{f18} \rightarrow 0$   | Loss of association of Mad2 and Cdc20P                  | 0.876    | 0.878    | 1.18     | 1.18     |
| 43 | $k'_{r18} \rightarrow 0$  | Loss of dissociation of Mad2:Cdc20P                     | inviable | inviable | inviable | Inviable |
| 44 | $k_{s1} \rightarrow 0$    | Loss of CCNB1 gene                                      | inviable | inviable | inviable | Inviable |
| 45 | $k_{s5} \rightarrow 0$    | Loss of CDKN1A gene                                     | 1        | 1        | 1.343    | 1.909    |
| 46 | $k_{s8} \rightarrow 0$    | Loss of CDC25 gene                                      | inviable | inviable | inviable | inviable |
| 47 | $k_{s9} \rightarrow 0$    | Loss of WEE1 gene                                       | inviable | inviable | inviable | inviable |
| 48 | $k_{s12} \rightarrow 0$   | Loss of PLK1 gene                                       | inviable | inviable | inviable | inviable |
| 49 | $k_{s13} \rightarrow 0$   | Loss of PP2ACA gene                                     | inviable | inviable | inviable | inviable |
| 50 | $k_{s15} \rightarrow 0$   | Loss of ANAPC/C1 gene                                   | inviable | inviable | inviable | inviable |
| 51 | $k_{s17} \rightarrow 0$   | Loss of CDC20 gene                                      | inviable | inviable | inviable | inviable |
| 52 | $k_{s20} \rightarrow 0$   | Loss of CDH1 gene                                       | 0.324    | 0.322    | 0.345    | inviable |
| 53 | $k_{s24} \rightarrow 0$   | Loss of PTTG1 gene                                      | 1.05     | 1.05     | 1.626    | 2.143    |
| 54 | $k_{s27} \rightarrow 0$   | Loss of ATM gene                                        | 0.998    | 0.998    | 1.357    | 1.357    |
| 55 | $k_{s28} \rightarrow 0$   | Loss of TP53 gene                                       | 1        | 1        | 1.837    | 1.837    |
| 56 | $k_{s31} \rightarrow 0$   | Loss of Mad2 gene                                       | 1        | 1        | 1.382    | 1.837    |
| 57 | $k_{s31p} \rightarrow 0$  | Loss of p53P-dependent Mdm2 synthesis rate constant     | 1        | 1        | 1.298    | 1.837    |
| 58 | $k_{s32} \rightarrow 0$   | Loss of Wip1 synthesis rate constant                    | 1        | 1        | 1.382    | 1.837    |
| 59 | $k_{s32p} \rightarrow 0$  | Loss of p53P-dependent Wip1 synthesis rate constant     | 1        | 1        | 1.655    | 1.837    |

|    |                           |                                             |           |           |           |           |
|----|---------------------------|---------------------------------------------|-----------|-----------|-----------|-----------|
| 60 | $k_{s33} \rightarrow 0$   | Loss of Mad2 synthesis rate constant        | 0.876     | 0.876     | 1.18      | 1.18      |
| 61 | $k_{d1.1} \rightarrow 0$  | CycB degron deletion                        | 1.029     | 1.202     | 1.159     | inviabile |
| 62 | $k_{d1.2} \rightarrow 0$  | Loss of CycB degron site for APC/CP:Cdc20   | 1.174     | 1.409     | 1.424     | inviabile |
| 63 | $k_{d1.3} \rightarrow 0$  | Loss of CycB degron site for APC/CT:Cdh1    | 0.831     | 0.868     | 0.901     | 1.252     |
| 64 | $k_{d3.1} \rightarrow 0$  | MPF degron deletion                         | 1.062     | 1.225     | 1.343     | inviabile |
| 65 | $k_{d3.2} \rightarrow 0$  | Loss of MPF degron site for APC/CP:Cdc20    | inviabile | inviabile | 0.006     | inviabile |
| 66 | $k_{d3.3} \rightarrow 0$  | Loss of MPF degron site for APC/CT:Cdh1     | 0.57      | 0.847     | 0.636     | inviabile |
| 67 | $k_{d4.1} \rightarrow 0$  | preMPF degron deletion                      | 1.002     | 1.07      | 1.264     | 1.719     |
| 68 | $k_{d4.2} \rightarrow 0$  | Loss of preMPF degron site for APC/CP:Cdc20 | 1.174     | 1.411     | 1.399     | inviabile |
| 69 | $k_{d4.3} \rightarrow 0$  | Loss of preMPF degron site for APC/CT:Cdh1  | 0.758     | inviabile | 0.669     | inviabile |
| 70 | $k_{d5} \rightarrow 0$    | p21 degron deletion                         | 0.998     | 1         | 1.488     | 1.783     |
| 71 | $k_{d6} \rightarrow 0$    | Loss of p21 degron site for APC/CP:Cdc20    | 0.998     | 1         | 1.415     | 1.837     |
| 72 | $k_{d7.1} \rightarrow 0$  | Cdc25P degron deletion                      | 0.696     | 1.293     | 1.037     | inviabile |
| 73 | $k_{d7.3} \rightarrow 0$  | Loss of Cdc25P degron site for APC/CT:Cdh1  | 0.992     | 0.992     | 1.36      | 1.81      |
| 74 | $k_{d8.1} \rightarrow 0$  | Cdc25 degron deletion                       | 0.574     | 0.574     | 0.643     | 1.167     |
| 75 | $k_{d8.3} \rightarrow 0$  | Loss of Cdc25 degron site for APC/CT:Cdh1   | 0.533     | 0.533     | 0.57      | 0.812     |
| 76 | $k_{d9} \rightarrow 0$    | Wee1 degron deletion                        | inviabile | inviabile | inviabile | inviabile |
| 77 | $k_{d10} \rightarrow 0$   | Wee1P degron deletion                       | inviabile | inviabile | inviabile | inviabile |
| 78 | $k_{d11.1} \rightarrow 0$ | Plk1P degron deletion                       | inviabile | inviabile | inviabile | 1.719     |
| 79 | $k_{d11.3} \rightarrow 0$ | Loss of Plk1P degron site for APC/CT:Cdh1   | 0.837     | 0.839     | 1.174     | 1.529     |
| 80 | $k_{d12.1} \rightarrow 0$ | Plk1 degron deletion                        | inviabile | inviabile | 1.157     | 1.436     |
| 81 | $k_{d12.3} \rightarrow 0$ | Loss of Plk1 degron site for APC/CT:Cdh1    | 0.467     | 0.465     | 0.634     | 0.777     |
| 82 | $k_{d13} \rightarrow 0$   | PP2A degron deletion                        | inviabile | inviabile | inviabile | inviabile |
| 83 | $k_{d14} \rightarrow 0$   | PP2AP degron deletion                       | 1.087     | 1.087     | inviabile | inviabile |
| 84 | $k_{d15} \rightarrow 0$   | APC/C degron deletion                       | inviabile | inviabile | inviabile | inviabile |
| 85 | $k_{d16} \rightarrow 0$   | APC/CP degron deletion                      | 1.256     | 1.258     | 1.897     | 1.93      |
| 86 | $k_{d17.1} \rightarrow 0$ | Cdc20 degron deletion                       | 1.027     | 1.159     | 1.911     | inviabile |
| 87 | $k_{d17.3} \rightarrow 0$ | Loss of Cdc20 degron site for APC/CT:Cdh1   | 1.397     | 1.393     | inviabile | inviabile |
| 88 | $k_{d18.1} \rightarrow 0$ | Cdc20P degron deletion                      | 0.936     | 1.207     | 1.339     | inviabile |
| 89 | $k_{d18.3} \rightarrow 0$ | Loss of Cdc20P degron site for APC/CT:Cdh1  | 0.994     | 0.998     | 1.368     | 1.847     |
| 90 | $k_{d20} \rightarrow 0$   | Cdh1 degron deletion                        | inviabile | inviabile | inviabile | inviabile |
| 91 | $k_{d21} \rightarrow 0$   | Cdh1P degron deletion                       | 1.095     | 1.095     | 1.971     | inviabile |
| 92 | $k_{d24.1} \rightarrow 0$ | Pttg1 degron deletion                       | 0.996     | 0.998     | 1.372     | 1.824     |
| 93 | $k_{d24.2} \rightarrow 0$ | Loss of Pttg1 degron site for APC/CP:Cdc20  | 0.998     | 1         | 1.378     | 1.837     |
| 94 | $k_{d25.1} \rightarrow 0$ | Pttg1P degron deletion                      | 0.998     | 1         | 1.38      | 1.837     |

|     |                             |                                                                          |          |          |          |          |
|-----|-----------------------------|--------------------------------------------------------------------------|----------|----------|----------|----------|
| 95  | $k_{d25.2} \rightarrow 0$   | Loss of Pttg1P degron site for APC/CP:Cdc20                              | 1        | 1        | 1.38     | 1.837    |
| 96  | $k_{d27} \rightarrow 0$     | ATM_ATR degron deletion                                                  | 1.099    | inviable | inviable | inviable |
| 97  | $k_{d27p} \rightarrow 0$    | Loss of saturating Wip1-dependent ATM:ATR degradation rate               | 1        | 1        | 1.651    | 1.837    |
| 98  | $k_{d28} \rightarrow 0$     | p53 degron deletion                                                      | 1.174    | 1        | inviable | 1.837    |
| 99  | $k_{d28p} \rightarrow 0$    | Loss of Mdm2-dependent p53 degradation rate                              | 1        | 1        | 1.362    | 1.837    |
| 100 | $k_{d29} \rightarrow 0$     | Loss of p53P degradation rate constant                                   | 1        | 1        | 1.357    | 1.837    |
| 101 | $k_{d29p} \rightarrow 0$    | Loss of Mdm2-dependent p53P degradation rate                             | 1        | 1        | 1.308    | 1.837    |
| 102 | $k_{d31.1} \rightarrow 0$   | Loss of ATM-ATR dependent Mdm2 inactivation rate                         | 1        | 1        | 1.455    | 1.837    |
| 103 | $k_{d31} \rightarrow 0$     | Loss of Mdm2 degradation rate constant                                   | 0.998    | 1        | 1.355    | 1.837    |
| 104 | $k_{d32} \rightarrow 0$     | Loss of Wip1 degradation rate constant                                   | 1        | 1        | 1.353    | 1.829    |
| 105 | $k_{d33} \rightarrow 0$     | Loss of Mad2 degradation rate constant                                   | inviable | inviable | inviable | inviable |
| 106 | $K_{A1} \rightarrow 0$      | Loss of Intensifying scale rate of $k'_{f6}$ by ATM ATR                  | inviable | inviable | inviable | inviable |
| 107 | $K_P \rightarrow 0$         | Loss of intensifying scale rate of $k'_{f11}$ by Pttg1                   | 0.769    | 0.771    | 0.853    | 1.182    |
| 108 | $K_{A2} \rightarrow 0$      | Loss of intensifying scale rate of $k_{s8}$ by ATM ATR                   | inviable | inviable | inviable | inviable |
| 109 | $K_{p53} \rightarrow 0$     | Loss of intensifying scale rate of ks5 by p53                            | inviable | inviable | inviable | inviable |
| 110 | $K_{DDS} \rightarrow 0$     | Loss of intensifying scale rate of DDS                                   | 1        | 1        | 1.36     | 1.364    |
| 111 | $K_{A3} \rightarrow 0$      | Loss of intensifying scale rate of ks28 by ATM ATR                       | inviable | inviable | inviable | inviable |
| 112 | $K_{MCD} \rightarrow 0$     | Loss of intensifying scale rate of Mad2_Cdc20P dissociation by p21       | inviable | inviable | inviable | inviable |
| 113 | $\epsilon \rightarrow 0$    | Loss of intensifying scale of Plk1/p21                                   | 1.161    | inviable | 1.523    | inviable |
| 114 | $K_{CycB1} \rightarrow 0$   | Loss of MM constant of CycB degradation by APC/CP:Cdc20                  | inviable | inviable | inviable | inviable |
| 115 | $K_{CycB2} \rightarrow 0$   | Loss of MM constant of CycB degradation by APC/CP:Cdh1                   | inviable | inviable | inviable | inviable |
| 116 | $K_{MPF1} \rightarrow 0$    | Loss of MM constant of MPF degradation by APC/CP:Cdc20                   | inviable | inviable | inviable | inviable |
| 117 | $K_{MPF2} \rightarrow 0$    | Loss of MM constant of MPF degradation by APC/CT:Cdh1                    | inviable | inviable | inviable | inviable |
| 118 | $K_{preMPF1} \rightarrow 0$ | Loss of MM constant of MPF degradation by APC/CP:Cdc20                   | inviable | inviable | inviable | inviable |
| 119 | $K_{preMPF2} \rightarrow 0$ | Loss of MM constant of MPF degradation by APC/CP:Cdh1                    | inviable | inviable | inviable | inviable |
| 120 | $K_{p21MPF} \rightarrow 0$  | Loss of MM constant of p21 <sub>3</sub> :MPF degradation by APC/CP:Cdc20 | inviable | inviable | inviable | inviable |
| 121 | $K_{Cdc25P1} \rightarrow 0$ | Loss of MM constant of Cdc25CP Dephosphorylation by PP2A                 | inviable | inviable | inviable | inviable |
| 122 | $K_{Cdc25P2} \rightarrow 0$ | Loss of MM constant of Cdc25P degradation by APC/CT:Cdh1                 | inviable | inviable | inviable | inviable |
| 123 | $K_{Cdc25} \rightarrow 0$   | Loss of MM constant of Cdc25 degradation by APC/CT:Cdh1                  | inviable | inviable | inviable | inviable |
| 124 | $K_{Wee1P} \rightarrow 0$   | Loss of MM constant of Wee1P dephosphorylation by PP2A                   | inviable | inviable | inviable | inviable |

|     |                             |                                                           |          |          |          |          |
|-----|-----------------------------|-----------------------------------------------------------|----------|----------|----------|----------|
| 125 | $K_{Plk1P1} \rightarrow 0$  | Loss of MM constant of Plk1P dephosphorylation by PP2A    | inviable | inviable | inviable | inviable |
| 126 | $K_{Plk1P2} \rightarrow 0$  | Loss of MM constant of Plk1P degradation by APC/CT:Cdh1   | inviable | inviable | inviable | inviable |
| 127 | $K_{Plk1} \rightarrow 0$    | Loss of MM constant of Plk1 degradation by APC/CT:Cdh1    | inviable | inviable | inviable | inviable |
| 128 | $K_{APC/CP} \rightarrow 0$  | Loss of MM constant of APC/CP dephosphorylation by PP2A   | inviable | inviable | inviable | inviable |
| 129 | $K_{Cdc20P1} \rightarrow 0$ | Loss of MM constant of Cdc20P dephosphorylation by PP2A   | inviable | inviable | inviable | inviable |
| 130 | $K_{Cdc20} \rightarrow 0$   | Loss of MM constant of Cdc20 degradation by APC/CT:Cdh1   | inviable | inviable | inviable | inviable |
| 131 | $K_{Cdc20P2} \rightarrow 0$ | Loss of MM constant of Cdc20P degradation by APC/CT:Cdh1  | inviable | inviable | inviable | inviable |
| 132 | $K_{Cdh1P} \rightarrow 0$   | Loss of MM constant of Cdh1P dephosphorylation by PP2A    | inviable | inviable | inviable | inviable |
| 133 | $K_{Pttg1P1} \rightarrow 0$ | Loss of MM constant of Pttg1P dephosphorylation by PP2A   | inviable | inviable | inviable | inviable |
| 134 | $K_{Pttg1} \rightarrow 0$   | Loss of MM constant of Pttg1 degradation by APC/CP:Cdc20  | 1.002    | 1.002    | 1.386    | 1.839    |
| 135 | $K_{Pttg1P2} \rightarrow 0$ | Loss of MM constant of Pttg1P degradation by APC/CP:Cdc20 | inviable | inviable | inviable | inviable |
| 136 | $K_{ATMATR} \rightarrow 0$  | Loss of MM constant of p53 phosphorylation by Wip1        | inviable | inviable | inviable | inviable |
| 137 | $K_{Wip1} \rightarrow 0$    | Loss of MM constant of ATM_ATR signal degradation by Wip1 | inviable | inviable | inviable | inviable |

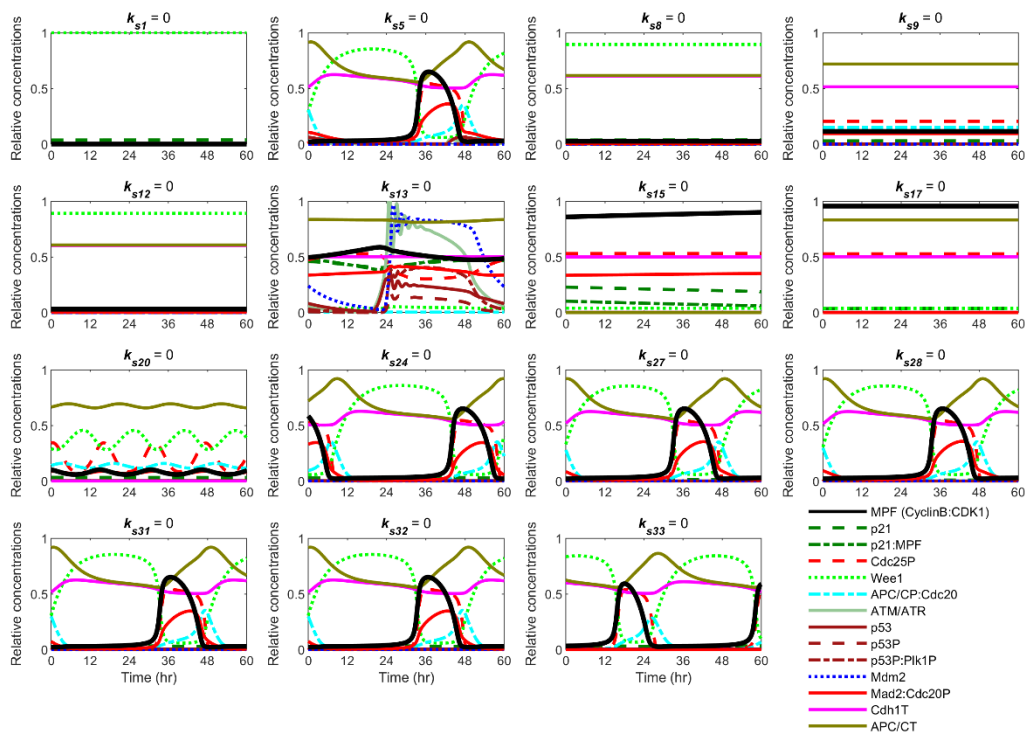

**Supplementary Figure 8. Numerical simulations of p53-wt cancer cells with the following gene deletions:** CCNB1 and CCNB2 ( $k_{s1}=0$ ), CDKN1A ( $k_{s5}=0$ ), CDC25A, CDC25B and CDC25C ( $k_{s8}=0$ ), WEE1 ( $k_{s9}=0$ ), PLK1 ( $k_{s12}=0$ ), PPA2 ( $k_{s13}=0$ ), ANAPC/C1 ( $k_{s15}=0$ ), CDC20 ( $k_{s17}=0$ ), CDH1 ( $k_{s20}=0$ ), PTTG1 ( $k_{s24}=0$ ), ATM ( $k_{s27}=0$ ), TP53 ( $k_{s28}=0$ ), Mdm2 ( $k_{s31}=0$ ), Wip1 ( $k_{s32}=0$ ), MAD2 ( $k_{s33}=0$ ).

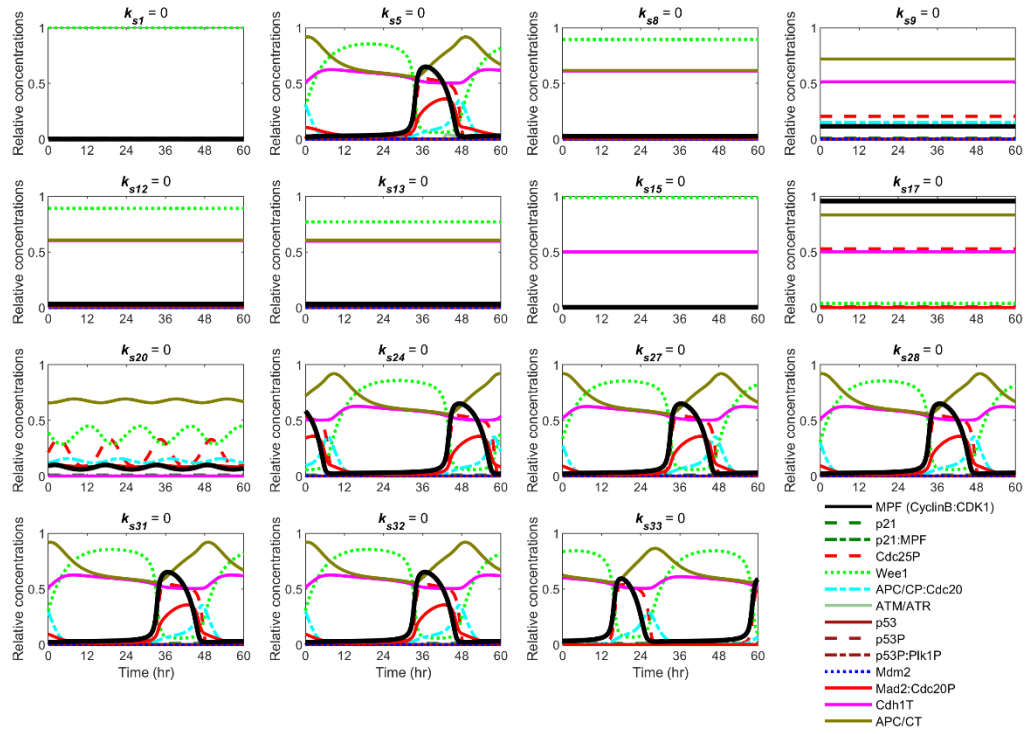

**Supplementary Figure 9. Numerical simulations of p53-null cancer cells with the following gene deletions:** CCNB1 and CCNB2 ( $k_{s1}=0$ ), CDKN1A ( $k_{s5}=0$ ), CDC25A, CDC25B and CDC25C ( $k_{s8}=0$ ), WEE1 ( $k_{s9}=0$ ), PLK1 ( $k_{s12}=0$ ), PPA2 ( $k_{s13}=0$ ), ANAPC/C1 ( $k_{s15}=0$ ), CDC20 ( $k_{s17}=0$ ), CDH1 ( $k_{s20}=0$ ), PTTG1 ( $k_{s24}=0$ ), ATM ( $k_{s27}=0$ ), TP53 ( $k_{s28}=0$ ), Mdm2 ( $k_{s31}=0$ ), Wip1 ( $k_{s32}=0$ ), MAD2 ( $k_{s33}=0$ ).

**Supplementary Table 9.** Parameter values used to model cell lines and CRISPR perturbations.

| Gene mutated in Cancer Cell Line | Parameter values used to model the corresponding cell line | Perturbed gene   | Parameter values used to model the perturbation |
|----------------------------------|------------------------------------------------------------|------------------|-------------------------------------------------|
| CCNB1                            | $k_{s1} = 0.095$                                           | CCNB1            | $k_{s1} = 0.095$                                |
| CDKN1A                           | $k_{s5} = 0$                                               | CDKN1A           | $k_{s5} = 0$                                    |
| CDC25                            | $k_{s8} = 0.095$                                           | CDC25            | $k_{s8} = 0.095$                                |
| WEE1                             | $k_{s9} = 0.0998$                                          | WEE1             | $k_{s9} = 0$                                    |
| PLK1                             | $k_{s12} = 0.096$                                          | PLK1             | $k_{s12} = 0$                                   |
| PP2ACA                           | $k_{s13} = 0.098$                                          | PP2ACA           | $k_{s13} = 0.062$                               |
| APC/C                            | $k_{s15} = 0.099$                                          | APC/C            | $k_{s15} = 0.03$                                |
| CDC20                            | $k_{s17} = 0.0997$                                         | CDC20            | $k_{s17} = 0$                                   |
| FZR1                             | $k_{s20} = 0$                                              | FZR1             | $k_{s20} = 0$                                   |
| PTTG1                            | $k_{s24} = 0.05$                                           | PTTG1            | $k_{s24} = 0$                                   |
| ATM and ATR                      | $k_{s27} = 0$                                              | ATM and ATR      | $k_{s27} = 0$                                   |
| TP53-null                        | $k_{s28} = 0$                                              | TP53-null        | $k_{s28} = 0$                                   |
| MDM2                             | $k_{s31} = 0$                                              | MDM2             | $k_{s31} = 0$                                   |
| PPM1D                            | $k_{s32} = 0.0998$                                         | PPM1D            | $k_{s32} = 0$                                   |
| Mad2L1 or MAD2L2                 | $k_{s33} = 0.0998$                                         | Mad2L1 or MAD2L2 | $k_{s33} = 0$                                   |
